# Supplementary material for: Postmortem examination of COVID‐19 patients reveals diffuse alveolar damage with severe capillary congestion and variegated findings in lungs and other organs suggesting vascular dysfunction
Source: PubMed Central journal article supplement (PMC7496150; doi:10.1111/his.14134), 2020-07-05
Supplement: HIS-77-198-s002.pdf [file HIS-77-198-s002.pdf]

| Case | Nr | Legend of sections          |                                                                                                                                                                                                                                                                                                                                                                                                                                                       |
|------|----|-----------------------------|-------------------------------------------------------------------------------------------------------------------------------------------------------------------------------------------------------------------------------------------------------------------------------------------------------------------------------------------------------------------------------------------------------------------------------------------------------|
| 1    | A  | Liver                       | <a href="https://ictvslidewp01.usb.ch/OlyViaWeb/Html5Viewer?dbId=798403c7-6d3e-4d97-a412-5bc0acd1705f&amp;recordId=42976&amp;layerId=10001&amp;x=206&amp;y=0&amp;scale=3.968496062007751&amp;angle=0&amp;vw=1540&amp;vh=868">https://ictvslidewp01.usb.ch/OlyViaWeb/Html5Viewer?dbId=798403c7-6d3e-4d97-a412-5bc0acd1705f&amp;recordId=42976&amp;layerId=10001&amp;x=206&amp;y=0&amp;scale=3.968496062007751&amp;angle=0&amp;vw=1540&amp;vh=868</a>   |
|      | B  | Myocardium (posterior wall) | <a href="https://ictvslidewp01.usb.ch/OlyViaWeb/Html5Viewer?dbId=798403c7-6d3e-4d97-a412-5bc0acd1705f&amp;recordId=42981&amp;layerId=10001&amp;x=377&amp;y=0&amp;scale=1.7536599032443907&amp;angle=0&amp;vw=1540&amp;vh=868">https://ictvslidewp01.usb.ch/OlyViaWeb/Html5Viewer?dbId=798403c7-6d3e-4d97-a412-5bc0acd1705f&amp;recordId=42981&amp;layerId=10001&amp;x=377&amp;y=0&amp;scale=1.7536599032443907&amp;angle=0&amp;vw=1540&amp;vh=868</a> |
|      | C  | Kidney (PAS)                | <a href="https://ictvslidewp01.usb.ch/OlyViaWeb/Html5Viewer?dbId=798403c7-6d3e-4d97-a412-5bc0acd1705f&amp;recordId=42986&amp;layerId=10001&amp;x=68&amp;y=0&amp;scale=4.697694576281936&amp;angle=0&amp;vw=1540&amp;vh=868">https://ictvslidewp01.usb.ch/OlyViaWeb/Html5Viewer?dbId=798403c7-6d3e-4d97-a412-5bc0acd1705f&amp;recordId=42986&amp;layerId=10001&amp;x=68&amp;y=0&amp;scale=4.697694576281936&amp;angle=0&amp;vw=1540&amp;vh=868</a>     |
|      | D  | Lung, upper lobe (right)    | <a href="https://ictvslidewp01.usb.ch/OlyViaWeb/Html5Viewer?dbId=798403c7-6d3e-4d97-a412-5bc0acd1705f&amp;recordId=42991&amp;layerId=10001&amp;x=222&amp;y=0&amp;scale=3.552912019826518&amp;angle=0&amp;vw=1540&amp;vh=868">https://ictvslidewp01.usb.ch/OlyViaWeb/Html5Viewer?dbId=798403c7-6d3e-4d97-a412-5bc0acd1705f&amp;recordId=42991&amp;layerId=10001&amp;x=222&amp;y=0&amp;scale=3.552912019826518&amp;angle=0&amp;vw=1540&amp;vh=868</a>   |
|      | E  | Lung, lower lobe (right)    | <a href="https://ictvslidewp01.usb.ch/OlyViaWeb/Html5Viewer?dbId=798403c7-6d3e-4d97-a412-5bc0acd1705f&amp;recordId=42996&amp;layerId=10001&amp;x=176&amp;y=0&amp;scale=3.677387857775277&amp;angle=0&amp;vw=1540&amp;vh=868">https://ictvslidewp01.usb.ch/OlyViaWeb/Html5Viewer?dbId=798403c7-6d3e-4d97-a412-5bc0acd1705f&amp;recordId=42996&amp;layerId=10001&amp;x=176&amp;y=0&amp;scale=3.677387857775277&amp;angle=0&amp;vw=1540&amp;vh=868</a>   |
|      | F  | Lung, upper lobe (left)     | <a href="https://ictvslidewp01.usb.ch/OlyViaWeb/Html5Viewer?dbId=798403c7-6d3e-4d97-a412-5bc0acd1705f&amp;recordId=43001&amp;layerId=10001&amp;x=174&amp;y=0&amp;scale=3.643679951463077&amp;angle=0&amp;vw=1540&amp;vh=868">https://ictvslidewp01.usb.ch/OlyViaWeb/Html5Viewer?dbId=798403c7-6d3e-4d97-a412-5bc0acd1705f&amp;recordId=43001&amp;layerId=10001&amp;x=174&amp;y=0&amp;scale=3.643679951463077&amp;angle=0&amp;vw=1540&amp;vh=868</a>   |
|      | G  | Lung, lower lobe (left)     | <a href="https://ictvslidewp01.usb.ch/OlyViaWeb/Html5Viewer?dbId=798403c7-6d3e-4d97-a412-5bc0acd1705f&amp;recordId=43006&amp;layerId=10001&amp;x=257&amp;y=0&amp;scale=3.462909861613265&amp;angle=0&amp;vw=1540&amp;vh=868">https://ictvslidewp01.usb.ch/OlyViaWeb/Html5Viewer?dbId=798403c7-6d3e-4d97-a412-5bc0acd1705f&amp;recordId=43006&amp;layerId=10001&amp;x=257&amp;y=0&amp;scale=3.462909861613265&amp;angle=0&amp;vw=1540&amp;vh=868</a>   |
|      |    |                             |                                                                                                                                                                                                                                                                                                                                                                                                                                                       |
| 2    | A  | Liver                       | <a href="https://ictvslidewp01.usb.ch/OlyViaWeb/Html5Viewer?dbId=798403c7-6d3e-4d97-a412-5bc0acd1705f&amp;recordId=43011&amp;layerId=10001&amp;x=105&amp;y=0&amp;scale=4.44914304020503&amp;angle=0&amp;vw=1540&amp;vh=868">https://ictvslidewp01.usb.ch/OlyViaWeb/Html5Viewer?dbId=798403c7-6d3e-4d97-a412-5bc0acd1705f&amp;recordId=43011&amp;layerId=10001&amp;x=105&amp;y=0&amp;scale=4.44914304020503&amp;angle=0&amp;vw=1540&amp;vh=868</a>     |
|      | B  | Liver (Copper stain)        | <a href="https://ictvslidewp01.usb.ch/OlyViaWeb/Html5Viewer?dbId=798403c7-6d3e-4d97-a412-5bc0acd1705f&amp;recordId=43016&amp;layerId=10001&amp;x=85&amp;y=0&amp;scale=4.569971310168952&amp;angle=0&amp;vw=1540&amp;vh=868">https://ictvslidewp01.usb.ch/OlyViaWeb/Html5Viewer?dbId=798403c7-6d3e-4d97-a412-5bc0acd1705f&amp;recordId=43016&amp;layerId=10001&amp;x=85&amp;y=0&amp;scale=4.569971310168952&amp;angle=0&amp;vw=1540&amp;vh=868</a>     |
|      | C  | Myocardium (posterior wall) | <a href="https://ictvslidewp01.usb.ch/OlyViaWeb/Html5Viewer?dbId=798403c7-6d3e-4d97-a412-5bc0acd1705f&amp;recordId=43021&amp;layerId=10001&amp;x=158&amp;y=0&amp;scale=3.8601903967757627&amp;angle=0&amp;vw=1540&amp;vh=868">https://ictvslidewp01.usb.ch/OlyViaWeb/Html5Viewer?dbId=798403c7-6d3e-4d97-a412-5bc0acd1705f&amp;recordId=43021&amp;layerId=10001&amp;x=158&amp;y=0&amp;scale=3.8601903967757627&amp;angle=0&amp;vw=1540&amp;vh=868</a> |
|      | D  | Kidney (PAS)                | <a href="https://ictvslidewp01.usb.ch/OlyViaWeb/Html5Viewer?dbId=798403c7-6d3e-4d97-a412-5bc0acd1705f&amp;recordId=43026&amp;layerId=10001&amp;x=243&amp;y=0&amp;scale=3.760628215542919&amp;angle=0&amp;vw=1540&amp;vh=868">https://ictvslidewp01.usb.ch/OlyViaWeb/Html5Viewer?dbId=798403c7-6d3e-4d97-a412-5bc0acd1705f&amp;recordId=43026&amp;layerId=10001&amp;x=243&amp;y=0&amp;scale=3.760628215542919&amp;angle=0&amp;vw=1540&amp;vh=868</a>   |
|      | E  | Lung, upper lobe (right)    | <a href="https://ictvslidewp01.usb.ch/OlyViaWeb/Html5Viewer?dbId=798403c7-6d3e-4d97-a412-5bc0acd1705f&amp;recordId=43031&amp;layerId=10001&amp;x=283&amp;y=0&amp;scale=2.0846201474754675&amp;angle=0&amp;vw=1540&amp;vh=868">https://ictvslidewp01.usb.ch/OlyViaWeb/Html5Viewer?dbId=798403c7-6d3e-4d97-a412-5bc0acd1705f&amp;recordId=43031&amp;layerId=10001&amp;x=283&amp;y=0&amp;scale=2.0846201474754675&amp;angle=0&amp;vw=1540&amp;vh=868</a> |
|      | F  | Lung, lower lobe (right)    | <a href="https://ictvslidewp01.usb.ch/OlyViaWeb/Html5Viewer?dbId=798403c7-6d3e-4d97-a412-5bc0acd1705f&amp;recordId=43036&amp;layerId=10001&amp;x=262&amp;y=0&amp;scale=3.25665376949232&amp;angle=0&amp;vw=1540&amp;vh=868">https://ictvslidewp01.usb.ch/OlyViaWeb/Html5Viewer?dbId=798403c7-6d3e-4d97-a412-5bc0acd1705f&amp;recordId=43036&amp;layerId=10001&amp;x=262&amp;y=0&amp;scale=3.25665376949232&amp;angle=0&amp;vw=1540&amp;vh=868</a>     |
|      | G  | Lung, upper lobe (left)     | <a href="https://ictvslidewp01.usb.ch/OlyViaWeb/Html5Viewer?dbId=798403c7-6d3e-4d97-a412-5bc0acd1705f&amp;recordId=43041&amp;layerId=10001&amp;x=185&amp;y=0&amp;scale=3.8398451675335674&amp;angle=0&amp;vw=1540&amp;vh=868">https://ictvslidewp01.usb.ch/OlyViaWeb/Html5Viewer?dbId=798403c7-6d3e-4d97-a412-5bc0acd1705f&amp;recordId=43041&amp;layerId=10001&amp;x=185&amp;y=0&amp;scale=3.8398451675335674&amp;angle=0&amp;vw=1540&amp;vh=868</a> |

|   |   |                                      |                                                                                                                                                                                                                                                                                                                                                                                                                                                                                                                       |
|---|---|--------------------------------------|-----------------------------------------------------------------------------------------------------------------------------------------------------------------------------------------------------------------------------------------------------------------------------------------------------------------------------------------------------------------------------------------------------------------------------------------------------------------------------------------------------------------------|
|   | H | Lung, lower lobe (left)              | <a href="https://ictvslidewp01.usb.ch/OlyViaWeb/Html5Viewer?dbId=798403c7-6d3e-4d97-a412-5bc0acd1705f&amp;recordId=43046&amp;layerId=10001&amp;x=175&amp;y=0&amp;scale=3.6538053621198543&amp;angle=0&amp;vw=1540&amp;vh=868">https://ictvslidewp01.usb.ch/OlyViaWeb/Html5Viewer?dbId=798403c7-6d3e-4d97-a412-5bc0acd1705f&amp;recordId=43046&amp;layerId=10001&amp;x=175&amp;y=0&amp;scale=3.6538053621198543&amp;angle=0&amp;vw=1540&amp;vh=868</a>                                                                 |
| 3 | A | Liver                                | <a href="https://ictvslidewp01.usb.ch/OlyViaWeb/Html5Viewer?dbId=798403c7-6d3e-4d97-a412-5bc0acd1705f&amp;recordId=43051&amp;layerId=10001&amp;x=268&amp;y=0&amp;scale=2.3437684583579443&amp;angle=0&amp;vw=1540&amp;vh=868">https://ictvslidewp01.usb.ch/OlyViaWeb/Html5Viewer?dbId=798403c7-6d3e-4d97-a412-5bc0acd1705f&amp;recordId=43051&amp;layerId=10001&amp;x=268&amp;y=0&amp;scale=2.3437684583579443&amp;angle=0&amp;vw=1540&amp;vh=868</a>                                                                 |
|   | B | Myocardium (anterior wall)           | <a href="https://ictvslidewp01.usb.ch/OlyViaWeb/Html5Viewer?dbId=798403c7-6d3e-4d97-a412-5bc0acd1705f&amp;recordId=43056&amp;layerId=10001&amp;x=272&amp;y=0&amp;scale=3.389435470339694&amp;angle=0&amp;vw=1540&amp;vh=868">https://ictvslidewp01.usb.ch/OlyViaWeb/Html5Viewer?dbId=798403c7-6d3e-4d97-a412-5bc0acd1705f&amp;recordId=43056&amp;layerId=10001&amp;x=272&amp;y=0&amp;scale=3.389435470339694&amp;angle=0&amp;vw=1540&amp;vh=868</a>                                                                   |
|   | C | Kidney (PAS)                         | <a href="https://ictvslidewp01.usb.ch/OlyViaWeb/Html5Viewer?dbId=798403c7-6d3e-4d97-a412-5bc0acd1705f&amp;recordId=43061&amp;layerId=10001&amp;x=278&amp;y=0&amp;scale=1.9647732899483625&amp;angle=0&amp;vw=1540&amp;vh=868">https://ictvslidewp01.usb.ch/OlyViaWeb/Html5Viewer?dbId=798403c7-6d3e-4d97-a412-5bc0acd1705f&amp;recordId=43061&amp;layerId=10001&amp;x=278&amp;y=0&amp;scale=1.9647732899483625&amp;angle=0&amp;vw=1540&amp;vh=868</a>                                                                 |
|   | D | Lung, middle lobe (right)            | <a href="https://ictvslidewp01.usb.ch/OlyViaWeb/Html5Viewer?dbId=798403c7-6d3e-4d97-a412-5bc0acd1705f&amp;recordId=43066&amp;layerId=10001&amp;x=294&amp;y=0&amp;scale=1.933504459430063&amp;angle=0&amp;vw=1540&amp;vh=868">https://ictvslidewp01.usb.ch/OlyViaWeb/Html5Viewer?dbId=798403c7-6d3e-4d97-a412-5bc0acd1705f&amp;recordId=43066&amp;layerId=10001&amp;x=294&amp;y=0&amp;scale=1.933504459430063&amp;angle=0&amp;vw=1540&amp;vh=868</a>                                                                   |
|   | E | Lung, lower lobe (right)             | <a href="https://ictvslidewp01.usb.ch/OlyViaWeb/Html5Viewer?dbId=798403c7-6d3e-4d97-a412-5bc0acd1705f&amp;recordId=43071&amp;layerId=10001&amp;x=178&amp;y=0&amp;scale=4.532082398531512&amp;angle=0&amp;vw=1540&amp;vh=868">https://ictvslidewp01.usb.ch/OlyViaWeb/Html5Viewer?dbId=798403c7-6d3e-4d97-a412-5bc0acd1705f&amp;recordId=43071&amp;layerId=10001&amp;x=178&amp;y=0&amp;scale=4.532082398531512&amp;angle=0&amp;vw=1540&amp;vh=868</a>                                                                   |
|   | F | Lung, upper lobe (left)              | <a href="https://ictvslidewp01.usb.ch/OlyViaWeb/Html5Viewer?dbId=798403c7-6d3e-4d97-a412-5bc0acd1705f&amp;recordId=43076&amp;layerId=10001&amp;x=247&amp;y=0&amp;scale=3.9366125446218984&amp;angle=0&amp;vw=1540&amp;vh=868">https://ictvslidewp01.usb.ch/OlyViaWeb/Html5Viewer?dbId=798403c7-6d3e-4d97-a412-5bc0acd1705f&amp;recordId=43076&amp;layerId=10001&amp;x=247&amp;y=0&amp;scale=3.9366125446218984&amp;angle=0&amp;vw=1540&amp;vh=868</a>                                                                 |
|   | G | Lung, lower lobe (left)              | <a href="https://ictvslidewp01.usb.ch/OlyViaWeb/Html5Viewer?dbId=798403c7-6d3e-4d97-a412-5bc0acd1705f&amp;recordId=43081&amp;layerId=10001&amp;x=351&amp;y=0&amp;scale=1.7621430440678502&amp;angle=0&amp;vw=1540&amp;vh=868">https://ictvslidewp01.usb.ch/OlyViaWeb/Html5Viewer?dbId=798403c7-6d3e-4d97-a412-5bc0acd1705f&amp;recordId=43081&amp;layerId=10001&amp;x=351&amp;y=0&amp;scale=1.7621430440678502&amp;angle=0&amp;vw=1540&amp;vh=868</a>                                                                 |
|   | H | Trachea with paratracheal lymph node | <a href="https://ictvslidewp01.usb.ch/OlyViaWeb/Html5Viewer?dbId=798403c7-6d3e-4d97-a412-5bc0acd1705f&amp;recordId=43086&amp;layerId=10001&amp;x=354.0232586948169&amp;y=119.12629864885991&amp;scale=1.8100909286665067&amp;angle=0&amp;vw=1540&amp;vh=868">https://ictvslidewp01.usb.ch/OlyViaWeb/Html5Viewer?dbId=798403c7-6d3e-4d97-a412-5bc0acd1705f&amp;recordId=43086&amp;layerId=10001&amp;x=354.0232586948169&amp;y=119.12629864885991&amp;scale=1.8100909286665067&amp;angle=0&amp;vw=1540&amp;vh=868</a>   |
|   | I | Spleen (PAS)                         | <a href="https://ictvslidewp01.usb.ch/OlyViaWeb/Html5Viewer?dbId=798403c7-6d3e-4d97-a412-5bc0acd1705f&amp;recordId=43091&amp;layerId=10001&amp;x=451&amp;y=0&amp;scale=1.8485292160255557&amp;angle=0&amp;vw=1540&amp;vh=868">https://ictvslidewp01.usb.ch/OlyViaWeb/Html5Viewer?dbId=798403c7-6d3e-4d97-a412-5bc0acd1705f&amp;recordId=43091&amp;layerId=10001&amp;x=451&amp;y=0&amp;scale=1.8485292160255557&amp;angle=0&amp;vw=1540&amp;vh=868</a>                                                                 |
| 4 | A | Myocardium (anterior wall)           | <a href="https://ictvslidewp01.usb.ch/OlyViaWeb/Html5Viewer?dbId=798403c7-6d3e-4d97-a412-5bc0acd1705f&amp;recordId=43096&amp;layerId=10001&amp;x=139&amp;y=0&amp;scale=2.539723177854228&amp;angle=0&amp;vw=1540&amp;vh=868">https://ictvslidewp01.usb.ch/OlyViaWeb/Html5Viewer?dbId=798403c7-6d3e-4d97-a412-5bc0acd1705f&amp;recordId=43096&amp;layerId=10001&amp;x=139&amp;y=0&amp;scale=2.539723177854228&amp;angle=0&amp;vw=1540&amp;vh=868</a>                                                                   |
|   | B | Lung, upper lobe (right)             | <a href="https://ictvslidewp01.usb.ch/OlyViaWeb/Html5Viewer?dbId=798403c7-6d3e-4d97-a412-5bc0acd1705f&amp;recordId=43101&amp;layerId=10001&amp;x=243.13194534000036&amp;y=3.7954978399973242&amp;scale=3.8367206778243527&amp;angle=0&amp;vw=1540&amp;vh=868">https://ictvslidewp01.usb.ch/OlyViaWeb/Html5Viewer?dbId=798403c7-6d3e-4d97-a412-5bc0acd1705f&amp;recordId=43101&amp;layerId=10001&amp;x=243.13194534000036&amp;y=3.7954978399973242&amp;scale=3.8367206778243527&amp;angle=0&amp;vw=1540&amp;vh=868</a> |
|   | C | Lung, middle lobe (right)            | <a href="https://ictvslidewp01.usb.ch/OlyViaWeb/Html5Viewer?dbId=798403c7-6d3e-4d97-a412-5bc0acd1705f&amp;recordId=43106&amp;layerId=10001&amp;x=178&amp;y=0&amp;scale=3.853362466618111&amp;angle=0&amp;vw=1540&amp;vh=868">https://ictvslidewp01.usb.ch/OlyViaWeb/Html5Viewer?dbId=798403c7-6d3e-4d97-a412-5bc0acd1705f&amp;recordId=43106&amp;layerId=10001&amp;x=178&amp;y=0&amp;scale=3.853362466618111&amp;angle=0&amp;vw=1540&amp;vh=868</a>                                                                   |
|   | D | Lung, upper lobe (left)              | <a href="https://ictvslidewp01.usb.ch/OlyViaWeb/Html5Viewer?dbId=798403c7-6d3e-4d97-a412-5bc0acd1705f&amp;recordId=43111&amp;layerId=10001&amp;x=278&amp;y=0&amp;scale=3.5586874009064555&amp;angle=0&amp;vw=1540&amp;vh=868">https://ictvslidewp01.usb.ch/OlyViaWeb/Html5Viewer?dbId=798403c7-6d3e-4d97-a412-5bc0acd1705f&amp;recordId=43111&amp;layerId=10001&amp;x=278&amp;y=0&amp;scale=3.5586874009064555&amp;angle=0&amp;vw=1540&amp;vh=868</a>                                                                 |

|   |   |                                      |                                                                                                                                                                                                                                                                                                                                                                                                                                                                                                                     |
|---|---|--------------------------------------|---------------------------------------------------------------------------------------------------------------------------------------------------------------------------------------------------------------------------------------------------------------------------------------------------------------------------------------------------------------------------------------------------------------------------------------------------------------------------------------------------------------------|
|   | E | Lung, lower lobe (left)              | <a href="https://ictvslidewp01.usb.ch/OlyViaWeb/Html5Viewer?dbId=798403c7-6d3e-4d97-a412-5bc0acd1705f&amp;recordId=43116&amp;layerId=10001&amp;x=173&amp;y=0&amp;scale=4.351729270298852&amp;angle=0&amp;vw=1540&amp;vh=868">https://ictvslidewp01.usb.ch/OlyViaWeb/Html5Viewer?dbId=798403c7-6d3e-4d97-a412-5bc0acd1705f&amp;recordId=43116&amp;layerId=10001&amp;x=173&amp;y=0&amp;scale=4.351729270298852&amp;angle=0&amp;vw=1540&amp;vh=868</a>                                                                 |
|   | F | Trachea with paratracheal lymph node | <a href="https://ictvslidewp01.usb.ch/OlyViaWeb/Html5Viewer?dbId=798403c7-6d3e-4d97-a412-5bc0acd1705f&amp;recordId=43121&amp;layerId=10001&amp;x=349.5273999308849&amp;y=57.458605382255655&amp;scale=4.0412569067504735&amp;angle=0&amp;vw=1540&amp;vh=868">https://ictvslidewp01.usb.ch/OlyViaWeb/Html5Viewer?dbId=798403c7-6d3e-4d97-a412-5bc0acd1705f&amp;recordId=43121&amp;layerId=10001&amp;x=349.5273999308849&amp;y=57.458605382255655&amp;scale=4.0412569067504735&amp;angle=0&amp;vw=1540&amp;vh=868</a> |
| 5 | A | Liver                                | <a href="https://ictvslidewp01.usb.ch/OlyViaWeb/Html5Viewer?dbId=798403c7-6d3e-4d97-a412-5bc0acd1705f&amp;recordId=43126&amp;layerId=10001&amp;x=163&amp;y=0&amp;scale=4.440962506994963&amp;angle=0&amp;vw=1540&amp;vh=868">https://ictvslidewp01.usb.ch/OlyViaWeb/Html5Viewer?dbId=798403c7-6d3e-4d97-a412-5bc0acd1705f&amp;recordId=43126&amp;layerId=10001&amp;x=163&amp;y=0&amp;scale=4.440962506994963&amp;angle=0&amp;vw=1540&amp;vh=868</a>                                                                 |
|   | B | Myocardium (posterior wall)          | <a href="https://ictvslidewp01.usb.ch/OlyViaWeb/Html5Viewer?dbId=798403c7-6d3e-4d97-a412-5bc0acd1705f&amp;recordId=43131&amp;layerId=10001&amp;x=209&amp;y=0&amp;scale=3.7365035858717492&amp;angle=0&amp;vw=1540&amp;vh=868">https://ictvslidewp01.usb.ch/OlyViaWeb/Html5Viewer?dbId=798403c7-6d3e-4d97-a412-5bc0acd1705f&amp;recordId=43131&amp;layerId=10001&amp;x=209&amp;y=0&amp;scale=3.7365035858717492&amp;angle=0&amp;vw=1540&amp;vh=868</a>                                                               |
|   | C | Kidney (PAS)                         | <a href="https://ictvslidewp01.usb.ch/OlyViaWeb/Html5Viewer?dbId=798403c7-6d3e-4d97-a412-5bc0acd1705f&amp;recordId=43136&amp;layerId=10001&amp;x=233&amp;y=0&amp;scale=3.42493391595188&amp;angle=0&amp;vw=1540&amp;vh=868">https://ictvslidewp01.usb.ch/OlyViaWeb/Html5Viewer?dbId=798403c7-6d3e-4d97-a412-5bc0acd1705f&amp;recordId=43136&amp;layerId=10001&amp;x=233&amp;y=0&amp;scale=3.42493391595188&amp;angle=0&amp;vw=1540&amp;vh=868</a>                                                                   |
|   | D | Lung, upper lobe (right)             | <a href="https://ictvslidewp01.usb.ch/OlyViaWeb/Html5Viewer?dbId=798403c7-6d3e-4d97-a412-5bc0acd1705f&amp;recordId=43141&amp;layerId=10001&amp;x=193&amp;y=0&amp;scale=4.0836174181514115&amp;angle=0&amp;vw=1540&amp;vh=868">https://ictvslidewp01.usb.ch/OlyViaWeb/Html5Viewer?dbId=798403c7-6d3e-4d97-a412-5bc0acd1705f&amp;recordId=43141&amp;layerId=10001&amp;x=193&amp;y=0&amp;scale=4.0836174181514115&amp;angle=0&amp;vw=1540&amp;vh=868</a>                                                               |
|   | E | Lung, middle lobe (right)            | <a href="https://ictvslidewp01.usb.ch/OlyViaWeb/Html5Viewer?dbId=798403c7-6d3e-4d97-a412-5bc0acd1705f&amp;recordId=43146&amp;layerId=10001&amp;x=172&amp;y=0&amp;scale=4.637836032726666&amp;angle=0&amp;vw=1540&amp;vh=868">https://ictvslidewp01.usb.ch/OlyViaWeb/Html5Viewer?dbId=798403c7-6d3e-4d97-a412-5bc0acd1705f&amp;recordId=43146&amp;layerId=10001&amp;x=172&amp;y=0&amp;scale=4.637836032726666&amp;angle=0&amp;vw=1540&amp;vh=868</a>                                                                 |
|   | F | Lung, upper lobe (right)             | <a href="https://ictvslidewp01.usb.ch/OlyViaWeb/Html5Viewer?dbId=798403c7-6d3e-4d97-a412-5bc0acd1705f&amp;recordId=43151&amp;layerId=10001&amp;x=319&amp;y=0&amp;scale=2.1046808994298054&amp;angle=0&amp;vw=1540&amp;vh=868">https://ictvslidewp01.usb.ch/OlyViaWeb/Html5Viewer?dbId=798403c7-6d3e-4d97-a412-5bc0acd1705f&amp;recordId=43151&amp;layerId=10001&amp;x=319&amp;y=0&amp;scale=2.1046808994298054&amp;angle=0&amp;vw=1540&amp;vh=868</a>                                                               |
|   | G | Lung, upper lobe (left)              | <a href="https://ictvslidewp01.usb.ch/OlyViaWeb/Html5Viewer?dbId=798403c7-6d3e-4d97-a412-5bc0acd1705f&amp;recordId=43156&amp;layerId=10001&amp;x=360&amp;y=0&amp;scale=1.909856636985595&amp;angle=0&amp;vw=1540&amp;vh=868">https://ictvslidewp01.usb.ch/OlyViaWeb/Html5Viewer?dbId=798403c7-6d3e-4d97-a412-5bc0acd1705f&amp;recordId=43156&amp;layerId=10001&amp;x=360&amp;y=0&amp;scale=1.909856636985595&amp;angle=0&amp;vw=1540&amp;vh=868</a>                                                                 |
|   | H | Lung, lower lobe (left)              | <a href="https://ictvslidewp01.usb.ch/OlyViaWeb/Html5Viewer?dbId=798403c7-6d3e-4d97-a412-5bc0acd1705f&amp;recordId=43161&amp;layerId=10001&amp;x=371&amp;y=0&amp;scale=2.358921007654009&amp;angle=0&amp;vw=1540&amp;vh=868">https://ictvslidewp01.usb.ch/OlyViaWeb/Html5Viewer?dbId=798403c7-6d3e-4d97-a412-5bc0acd1705f&amp;recordId=43161&amp;layerId=10001&amp;x=371&amp;y=0&amp;scale=2.358921007654009&amp;angle=0&amp;vw=1540&amp;vh=868</a>                                                                 |
|   | I | Trachea with paratracheal lymph node | <a href="https://ictvslidewp01.usb.ch/OlyViaWeb/Html5Viewer?dbId=798403c7-6d3e-4d97-a412-5bc0acd1705f&amp;recordId=43166&amp;layerId=10001&amp;x=462.204627636165&amp;y=49.88387918542708&amp;scale=2.760891057689126&amp;angle=0&amp;vw=1540&amp;vh=868">https://ictvslidewp01.usb.ch/OlyViaWeb/Html5Viewer?dbId=798403c7-6d3e-4d97-a412-5bc0acd1705f&amp;recordId=43166&amp;layerId=10001&amp;x=462.204627636165&amp;y=49.88387918542708&amp;scale=2.760891057689126&amp;angle=0&amp;vw=1540&amp;vh=868</a>       |
| 6 | A | Liver                                | <a href="https://ictvslidewp01.usb.ch/OlyViaWeb/Html5Viewer?dbId=798403c7-6d3e-4d97-a412-5bc0acd1705f&amp;recordId=43171&amp;layerId=10001&amp;x=147&amp;y=0&amp;scale=4.334497220325758&amp;angle=0&amp;vw=1540&amp;vh=868">https://ictvslidewp01.usb.ch/OlyViaWeb/Html5Viewer?dbId=798403c7-6d3e-4d97-a412-5bc0acd1705f&amp;recordId=43171&amp;layerId=10001&amp;x=147&amp;y=0&amp;scale=4.334497220325758&amp;angle=0&amp;vw=1540&amp;vh=868</a>                                                                 |
|   | B | Myocardium (anterior wall)           | <a href="https://ictvslidewp01.usb.ch/OlyViaWeb/Html5Viewer?dbId=798403c7-6d3e-4d97-a412-5bc0acd1705f&amp;recordId=43176&amp;layerId=10001&amp;x=253&amp;y=0&amp;scale=3.393110188126069&amp;angle=0&amp;vw=1540&amp;vh=868">https://ictvslidewp01.usb.ch/OlyViaWeb/Html5Viewer?dbId=798403c7-6d3e-4d97-a412-5bc0acd1705f&amp;recordId=43176&amp;layerId=10001&amp;x=253&amp;y=0&amp;scale=3.393110188126069&amp;angle=0&amp;vw=1540&amp;vh=868</a>                                                                 |
|   | C | Kidney (PAS)                         | <a href="https://ictvslidewp01.usb.ch/OlyViaWeb/Html5Viewer?dbId=798403c7-6d3e-4d97-a412-5bc0acd1705f&amp;recordId=43181&amp;layerId=10001&amp;x=409.72902435175785&amp;y=94.73038311198581&amp;scale=1.6085591931233376&amp;angle=0&amp;vw=1540&amp;vh=868">https://ictvslidewp01.usb.ch/OlyViaWeb/Html5Viewer?dbId=798403c7-6d3e-4d97-a412-5bc0acd1705f&amp;recordId=43181&amp;layerId=10001&amp;x=409.72902435175785&amp;y=94.73038311198581&amp;scale=1.6085591931233376&amp;angle=0&amp;vw=1540&amp;vh=868</a> |

|   |   |                             |                                                                                                                                                                                                                                                                                                                                                                                                                                                       |
|---|---|-----------------------------|-------------------------------------------------------------------------------------------------------------------------------------------------------------------------------------------------------------------------------------------------------------------------------------------------------------------------------------------------------------------------------------------------------------------------------------------------------|
|   | D | Lung, upper lobe (right)    | <a href="https://ictvslidewp01.usb.ch/OlyViaWeb/Html5Viewer?dbId=798403c7-6d3e-4d97-a412-5bc0acd1705f&amp;recordId=43186&amp;layerId=10001&amp;x=237&amp;y=0&amp;scale=2.2200375654397954&amp;angle=0&amp;vw=1540&amp;vh=868">https://ictvslidewp01.usb.ch/OlyViaWeb/Html5Viewer?dbId=798403c7-6d3e-4d97-a412-5bc0acd1705f&amp;recordId=43186&amp;layerId=10001&amp;x=237&amp;y=0&amp;scale=2.2200375654397954&amp;angle=0&amp;vw=1540&amp;vh=868</a> |
|   | E | Lung, middle lobe (right)   | <a href="https://ictvslidewp01.usb.ch/OlyViaWeb/Html5Viewer?dbId=798403c7-6d3e-4d97-a412-5bc0acd1705f&amp;recordId=43191&amp;layerId=10001&amp;x=0&amp;y=136&amp;scale=5.160749816734737&amp;angle=0&amp;vw=1540&amp;vh=868">https://ictvslidewp01.usb.ch/OlyViaWeb/Html5Viewer?dbId=798403c7-6d3e-4d97-a412-5bc0acd1705f&amp;recordId=43191&amp;layerId=10001&amp;x=0&amp;y=136&amp;scale=5.160749816734737&amp;angle=0&amp;vw=1540&amp;vh=868</a>   |
|   | F | Lung, upper lobe (left)     | <a href="https://ictvslidewp01.usb.ch/OlyViaWeb/Html5Viewer?dbId=798403c7-6d3e-4d97-a412-5bc0acd1705f&amp;recordId=43196&amp;layerId=10001&amp;x=323&amp;y=0&amp;scale=1.7722197409557838&amp;angle=0&amp;vw=1540&amp;vh=868">https://ictvslidewp01.usb.ch/OlyViaWeb/Html5Viewer?dbId=798403c7-6d3e-4d97-a412-5bc0acd1705f&amp;recordId=43196&amp;layerId=10001&amp;x=323&amp;y=0&amp;scale=1.7722197409557838&amp;angle=0&amp;vw=1540&amp;vh=868</a> |
|   | G | Lung, lower lobe (left)     | <a href="https://ictvslidewp01.usb.ch/OlyViaWeb/Html5Viewer?dbId=798403c7-6d3e-4d97-a412-5bc0acd1705f&amp;recordId=43201&amp;layerId=10001&amp;x=310&amp;y=0&amp;scale=2.2897654672107497&amp;angle=0&amp;vw=1540&amp;vh=868">https://ictvslidewp01.usb.ch/OlyViaWeb/Html5Viewer?dbId=798403c7-6d3e-4d97-a412-5bc0acd1705f&amp;recordId=43201&amp;layerId=10001&amp;x=310&amp;y=0&amp;scale=2.2897654672107497&amp;angle=0&amp;vw=1540&amp;vh=868</a> |
|   | H | Spleen (PAS)                | <a href="https://ictvslidewp01.usb.ch/OlyViaWeb/Html5Viewer?dbId=798403c7-6d3e-4d97-a412-5bc0acd1705f&amp;recordId=43206&amp;layerId=10001&amp;x=226&amp;y=0&amp;scale=2.4652798579907915&amp;angle=0&amp;vw=1540&amp;vh=868">https://ictvslidewp01.usb.ch/OlyViaWeb/Html5Viewer?dbId=798403c7-6d3e-4d97-a412-5bc0acd1705f&amp;recordId=43206&amp;layerId=10001&amp;x=226&amp;y=0&amp;scale=2.4652798579907915&amp;angle=0&amp;vw=1540&amp;vh=868</a> |
|   | I | Bone marrow                 | <a href="https://ictvslidewp01.usb.ch/OlyViaWeb/Html5Viewer?dbId=798403c7-6d3e-4d97-a412-5bc0acd1705f&amp;recordId=43211&amp;layerId=10001&amp;x=0&amp;y=58&amp;scale=4.326127510150335&amp;angle=0&amp;vw=1540&amp;vh=868">https://ictvslidewp01.usb.ch/OlyViaWeb/Html5Viewer?dbId=798403c7-6d3e-4d97-a412-5bc0acd1705f&amp;recordId=43211&amp;layerId=10001&amp;x=0&amp;y=58&amp;scale=4.326127510150335&amp;angle=0&amp;vw=1540&amp;vh=868</a>     |
|   |   |                             |                                                                                                                                                                                                                                                                                                                                                                                                                                                       |
| 7 | A | Liver                       | <a href="https://ictvslidewp01.usb.ch/OlyViaWeb/Html5Viewer?dbId=798403c7-6d3e-4d97-a412-5bc0acd1705f&amp;recordId=43216&amp;layerId=10001&amp;x=289&amp;y=0&amp;scale=2.0224260958205913&amp;angle=0&amp;vw=1540&amp;vh=868">https://ictvslidewp01.usb.ch/OlyViaWeb/Html5Viewer?dbId=798403c7-6d3e-4d97-a412-5bc0acd1705f&amp;recordId=43216&amp;layerId=10001&amp;x=289&amp;y=0&amp;scale=2.0224260958205913&amp;angle=0&amp;vw=1540&amp;vh=868</a> |
|   | B | Myocardium (posterior wall) | <a href="https://ictvslidewp01.usb.ch/OlyViaWeb/Html5Viewer?dbId=798403c7-6d3e-4d97-a412-5bc0acd1705f&amp;recordId=43221&amp;layerId=10001&amp;x=251&amp;y=0&amp;scale=3.2277735410538546&amp;angle=0&amp;vw=1540&amp;vh=868">https://ictvslidewp01.usb.ch/OlyViaWeb/Html5Viewer?dbId=798403c7-6d3e-4d97-a412-5bc0acd1705f&amp;recordId=43221&amp;layerId=10001&amp;x=251&amp;y=0&amp;scale=3.2277735410538546&amp;angle=0&amp;vw=1540&amp;vh=868</a> |
|   | C | Kidney (PAS)                | <a href="https://ictvslidewp01.usb.ch/OlyViaWeb/Html5Viewer?dbId=798403c7-6d3e-4d97-a412-5bc0acd1705f&amp;recordId=43226&amp;layerId=10001&amp;x=171&amp;y=0&amp;scale=3.785001916279862&amp;angle=0&amp;vw=1540&amp;vh=868">https://ictvslidewp01.usb.ch/OlyViaWeb/Html5Viewer?dbId=798403c7-6d3e-4d97-a412-5bc0acd1705f&amp;recordId=43226&amp;layerId=10001&amp;x=171&amp;y=0&amp;scale=3.785001916279862&amp;angle=0&amp;vw=1540&amp;vh=868</a>   |
|   | D | Lung, upper lobe (right)    | <a href="https://ictvslidewp01.usb.ch/OlyViaWeb/Html5Viewer?dbId=798403c7-6d3e-4d97-a412-5bc0acd1705f&amp;recordId=43231&amp;layerId=10001&amp;x=376&amp;y=0&amp;scale=1.745271756204838&amp;angle=0&amp;vw=1540&amp;vh=868">https://ictvslidewp01.usb.ch/OlyViaWeb/Html5Viewer?dbId=798403c7-6d3e-4d97-a412-5bc0acd1705f&amp;recordId=43231&amp;layerId=10001&amp;x=376&amp;y=0&amp;scale=1.745271756204838&amp;angle=0&amp;vw=1540&amp;vh=868</a>   |
|   | E | Lung, middle lobe (right)   | <a href="https://ictvslidewp01.usb.ch/OlyViaWeb/Html5Viewer?dbId=798403c7-6d3e-4d97-a412-5bc0acd1705f&amp;recordId=43236&amp;layerId=10001&amp;x=327&amp;y=0&amp;scale=2.2613598200746976&amp;angle=0&amp;vw=1540&amp;vh=868">https://ictvslidewp01.usb.ch/OlyViaWeb/Html5Viewer?dbId=798403c7-6d3e-4d97-a412-5bc0acd1705f&amp;recordId=43236&amp;layerId=10001&amp;x=327&amp;y=0&amp;scale=2.2613598200746976&amp;angle=0&amp;vw=1540&amp;vh=868</a> |
|   | F | Lung, upper lobe (left)     | <a href="https://ictvslidewp01.usb.ch/OlyViaWeb/Html5Viewer?dbId=798403c7-6d3e-4d97-a412-5bc0acd1705f&amp;recordId=43241&amp;layerId=10001&amp;x=130&amp;y=0&amp;scale=4.283568998255405&amp;angle=0&amp;vw=1540&amp;vh=868">https://ictvslidewp01.usb.ch/OlyViaWeb/Html5Viewer?dbId=798403c7-6d3e-4d97-a412-5bc0acd1705f&amp;recordId=43241&amp;layerId=10001&amp;x=130&amp;y=0&amp;scale=4.283568998255405&amp;angle=0&amp;vw=1540&amp;vh=868</a>   |
|   | G | Lung, lower lobe (left)     | <a href="https://ictvslidewp01.usb.ch/OlyViaWeb/Html5Viewer?dbId=798403c7-6d3e-4d97-a412-5bc0acd1705f&amp;recordId=43246&amp;layerId=10001&amp;x=307&amp;y=0&amp;scale=2.1629661355163385&amp;angle=0&amp;vw=1540&amp;vh=868">https://ictvslidewp01.usb.ch/OlyViaWeb/Html5Viewer?dbId=798403c7-6d3e-4d97-a412-5bc0acd1705f&amp;recordId=43246&amp;layerId=10001&amp;x=307&amp;y=0&amp;scale=2.1629661355163385&amp;angle=0&amp;vw=1540&amp;vh=868</a> |
|   | H | Bone marrow                 | <a href="https://ictvslidewp01.usb.ch/OlyViaWeb/Html5Viewer?dbId=798403c7-6d3e-4d97-a412-5bc0acd1705f&amp;recordId=43251&amp;layerId=10001&amp;x=188&amp;y=0&amp;scale=2.8328765027601066&amp;angle=0&amp;vw=1540&amp;vh=868">https://ictvslidewp01.usb.ch/OlyViaWeb/Html5Viewer?dbId=798403c7-6d3e-4d97-a412-5bc0acd1705f&amp;recordId=43251&amp;layerId=10001&amp;x=188&amp;y=0&amp;scale=2.8328765027601066&amp;angle=0&amp;vw=1540&amp;vh=868</a> |
|   |   |                             |                                                                                                                                                                                                                                                                                                                                                                                                                                                       |
| 8 | A | Liver                       | <a href="https://ictvslidewp01.usb.ch/OlyViaWeb/Html5Viewer?dbId=798403c7-6d3e-4d97-a412-5bc0acd1705f&amp;recordId=43256&amp;layerId=10001&amp;x=275&amp;y=0&amp;scale=1.9579349904397704&amp;angle=0&amp;vw=1540&amp;vh=868">https://ictvslidewp01.usb.ch/OlyViaWeb/Html5Viewer?dbId=798403c7-6d3e-4d97-a412-5bc0acd1705f&amp;recordId=43256&amp;layerId=10001&amp;x=275&amp;y=0&amp;scale=1.9579349904397704&amp;angle=0&amp;vw=1540&amp;vh=868</a> |

|   |   |                                        |                                                                                                                                                                                                                                                                                                                                                                                                                                                                                                                   |
|---|---|----------------------------------------|-------------------------------------------------------------------------------------------------------------------------------------------------------------------------------------------------------------------------------------------------------------------------------------------------------------------------------------------------------------------------------------------------------------------------------------------------------------------------------------------------------------------|
|   | B | Myocardium (anterior wall)             | <a href="https://ictvslidewp01.usb.ch/OlyViaWeb/Html5Viewer?dbId=798403c7-6d3e-4d97-a412-5bc0acd1705f&amp;recordId=43261&amp;layerId=10001&amp;x=265&amp;y=0&amp;scale=3.6058093306288032&amp;angle=0&amp;vw=1540&amp;vh=868">https://ictvslidewp01.usb.ch/OlyViaWeb/Html5Viewer?dbId=798403c7-6d3e-4d97-a412-5bc0acd1705f&amp;recordId=43261&amp;layerId=10001&amp;x=265&amp;y=0&amp;scale=3.6058093306288032&amp;angle=0&amp;vw=1540&amp;vh=868</a>                                                             |
|   | C | Aortic aneurysm                        | <a href="https://ictvslidewp01.usb.ch/OlyViaWeb/Html5Viewer?dbId=798403c7-6d3e-4d97-a412-5bc0acd1705f&amp;recordId=43266&amp;layerId=10001&amp;x=214&amp;y=0&amp;scale=4.0684023581969315&amp;angle=0&amp;vw=1540&amp;vh=868">https://ictvslidewp01.usb.ch/OlyViaWeb/Html5Viewer?dbId=798403c7-6d3e-4d97-a412-5bc0acd1705f&amp;recordId=43266&amp;layerId=10001&amp;x=214&amp;y=0&amp;scale=4.0684023581969315&amp;angle=0&amp;vw=1540&amp;vh=868</a>                                                             |
|   | D | Kidney (PAS)                           | <a href="https://ictvslidewp01.usb.ch/OlyViaWeb/Html5Viewer?dbId=798403c7-6d3e-4d97-a412-5bc0acd1705f&amp;recordId=43271&amp;layerId=10001&amp;x=276&amp;y=0&amp;scale=1.9300951983878813&amp;angle=0&amp;vw=1540&amp;vh=868">https://ictvslidewp01.usb.ch/OlyViaWeb/Html5Viewer?dbId=798403c7-6d3e-4d97-a412-5bc0acd1705f&amp;recordId=43271&amp;layerId=10001&amp;x=276&amp;y=0&amp;scale=1.9300951983878813&amp;angle=0&amp;vw=1540&amp;vh=868</a>                                                             |
|   | E | Lung, upper lobe (right)               | <a href="https://ictvslidewp01.usb.ch/OlyViaWeb/Html5Viewer?dbId=798403c7-6d3e-4d97-a412-5bc0acd1705f&amp;recordId=43276&amp;layerId=10001&amp;x=360&amp;y=0&amp;scale=2.0380071905495636&amp;angle=0&amp;vw=1540&amp;vh=868">https://ictvslidewp01.usb.ch/OlyViaWeb/Html5Viewer?dbId=798403c7-6d3e-4d97-a412-5bc0acd1705f&amp;recordId=43276&amp;layerId=10001&amp;x=360&amp;y=0&amp;scale=2.0380071905495636&amp;angle=0&amp;vw=1540&amp;vh=868</a>                                                             |
|   | F | Lung, upper lobe (right)               | <a href="https://ictvslidewp01.usb.ch/OlyViaWeb/Html5Viewer?dbId=798403c7-6d3e-4d97-a412-5bc0acd1705f&amp;recordId=43281&amp;layerId=10001&amp;x=0&amp;y=106&amp;scale=3.047913566168654&amp;angle=0&amp;vw=1540&amp;vh=868">https://ictvslidewp01.usb.ch/OlyViaWeb/Html5Viewer?dbId=798403c7-6d3e-4d97-a412-5bc0acd1705f&amp;recordId=43281&amp;layerId=10001&amp;x=0&amp;y=106&amp;scale=3.047913566168654&amp;angle=0&amp;vw=1540&amp;vh=868</a>                                                               |
|   | G | Lung, lower lobe (left)                | <a href="https://ictvslidewp01.usb.ch/OlyViaWeb/Html5Viewer?dbId=798403c7-6d3e-4d97-a412-5bc0acd1705f&amp;recordId=43286&amp;layerId=10001&amp;x=378&amp;y=0&amp;scale=1.9438048917036985&amp;angle=0&amp;vw=1540&amp;vh=868">https://ictvslidewp01.usb.ch/OlyViaWeb/Html5Viewer?dbId=798403c7-6d3e-4d97-a412-5bc0acd1705f&amp;recordId=43286&amp;layerId=10001&amp;x=378&amp;y=0&amp;scale=1.9438048917036985&amp;angle=0&amp;vw=1540&amp;vh=868</a>                                                             |
|   | H | Lung, lower lobe (left)                | <a href="https://ictvslidewp01.usb.ch/OlyViaWeb/Html5Viewer?dbId=798403c7-6d3e-4d97-a412-5bc0acd1705f&amp;recordId=43291&amp;layerId=10001&amp;x=314&amp;y=0&amp;scale=2.137601970140065&amp;angle=0&amp;vw=1540&amp;vh=868">https://ictvslidewp01.usb.ch/OlyViaWeb/Html5Viewer?dbId=798403c7-6d3e-4d97-a412-5bc0acd1705f&amp;recordId=43291&amp;layerId=10001&amp;x=314&amp;y=0&amp;scale=2.137601970140065&amp;angle=0&amp;vw=1540&amp;vh=868</a>                                                               |
|   |   |                                        |                                                                                                                                                                                                                                                                                                                                                                                                                                                                                                                   |
| 9 | A | Liver                                  | <a href="https://ictvslidewp01.usb.ch/OlyViaWeb/Html5Viewer?dbId=798403c7-6d3e-4d97-a412-5bc0acd1705f&amp;recordId=43296&amp;layerId=10001&amp;x=320&amp;y=0&amp;scale=1.909856636985595&amp;angle=0&amp;vw=1540&amp;vh=868">https://ictvslidewp01.usb.ch/OlyViaWeb/Html5Viewer?dbId=798403c7-6d3e-4d97-a412-5bc0acd1705f&amp;recordId=43296&amp;layerId=10001&amp;x=320&amp;y=0&amp;scale=1.909856636985595&amp;angle=0&amp;vw=1540&amp;vh=868</a>                                                               |
|   | B | Myocardium (anterior wall)             | <a href="https://ictvslidewp01.usb.ch/OlyViaWeb/Html5Viewer?dbId=798403c7-6d3e-4d97-a412-5bc0acd1705f&amp;recordId=43301&amp;layerId=10001&amp;x=308&amp;y=0&amp;scale=3.58787722215943&amp;angle=0&amp;vw=1540&amp;vh=868">https://ictvslidewp01.usb.ch/OlyViaWeb/Html5Viewer?dbId=798403c7-6d3e-4d97-a412-5bc0acd1705f&amp;recordId=43301&amp;layerId=10001&amp;x=308&amp;y=0&amp;scale=3.58787722215943&amp;angle=0&amp;vw=1540&amp;vh=868</a>                                                                 |
|   | C | Myocardium (anterior wall) (Congo red) | <a href="https://ictvslidewp01.usb.ch/OlyViaWeb/Html5Viewer?dbId=798403c7-6d3e-4d97-a412-5bc0acd1705f&amp;recordId=43306&amp;layerId=10001&amp;x=385.90266974409166&amp;y=64.4406509866451&amp;scale=2.9101623012047297&amp;angle=0&amp;vw=1540&amp;vh=868">https://ictvslidewp01.usb.ch/OlyViaWeb/Html5Viewer?dbId=798403c7-6d3e-4d97-a412-5bc0acd1705f&amp;recordId=43306&amp;layerId=10001&amp;x=385.90266974409166&amp;y=64.4406509866451&amp;scale=2.9101623012047297&amp;angle=0&amp;vw=1540&amp;vh=868</a> |
|   | D | Kidney (PAS)                           | <a href="https://ictvslidewp01.usb.ch/OlyViaWeb/Html5Viewer?dbId=798403c7-6d3e-4d97-a412-5bc0acd1705f&amp;recordId=43311&amp;layerId=10001&amp;x=352&amp;y=0&amp;scale=2.0304279096117472&amp;angle=0&amp;vw=1540&amp;vh=868">https://ictvslidewp01.usb.ch/OlyViaWeb/Html5Viewer?dbId=798403c7-6d3e-4d97-a412-5bc0acd1705f&amp;recordId=43311&amp;layerId=10001&amp;x=352&amp;y=0&amp;scale=2.0304279096117472&amp;angle=0&amp;vw=1540&amp;vh=868</a>                                                             |
|   | E | Lung, upper lobe (right)               | <a href="https://ictvslidewp01.usb.ch/OlyViaWeb/Html5Viewer?dbId=798403c7-6d3e-4d97-a412-5bc0acd1705f&amp;recordId=43316&amp;layerId=10001&amp;x=303&amp;y=0&amp;scale=1.8485292160255557&amp;angle=0&amp;vw=1540&amp;vh=868">https://ictvslidewp01.usb.ch/OlyViaWeb/Html5Viewer?dbId=798403c7-6d3e-4d97-a412-5bc0acd1705f&amp;recordId=43316&amp;layerId=10001&amp;x=303&amp;y=0&amp;scale=1.8485292160255557&amp;angle=0&amp;vw=1540&amp;vh=868</a>                                                             |
|   | F | Trachea + Lung, middle lobe (right)    | <a href="https://ictvslidewp01.usb.ch/OlyViaWeb/Html5Viewer?dbId=798403c7-6d3e-4d97-a412-5bc0acd1705f&amp;recordId=43321&amp;layerId=10001&amp;x=257&amp;y=0&amp;scale=3.4142511427803175&amp;angle=0&amp;vw=1540&amp;vh=868">https://ictvslidewp01.usb.ch/OlyViaWeb/Html5Viewer?dbId=798403c7-6d3e-4d97-a412-5bc0acd1705f&amp;recordId=43321&amp;layerId=10001&amp;x=257&amp;y=0&amp;scale=3.4142511427803175&amp;angle=0&amp;vw=1540&amp;vh=868</a>                                                             |
|   | G | Lung, lower lobe (left)                | <a href="https://ictvslidewp01.usb.ch/OlyViaWeb/Html5Viewer?dbId=798403c7-6d3e-4d97-a412-5bc0acd1705f&amp;recordId=43326&amp;layerId=10001&amp;x=332&amp;y=0&amp;scale=2.0007203054094935&amp;angle=0&amp;vw=1540&amp;vh=868">https://ictvslidewp01.usb.ch/OlyViaWeb/Html5Viewer?dbId=798403c7-6d3e-4d97-a412-5bc0acd1705f&amp;recordId=43326&amp;layerId=10001&amp;x=332&amp;y=0&amp;scale=2.0007203054094935&amp;angle=0&amp;vw=1540&amp;vh=868</a>                                                             |

|    |   |                                 |                                                                                                                                                                                                                                                                                                                                                                                                                                                                                                                     |
|----|---|---------------------------------|---------------------------------------------------------------------------------------------------------------------------------------------------------------------------------------------------------------------------------------------------------------------------------------------------------------------------------------------------------------------------------------------------------------------------------------------------------------------------------------------------------------------|
|    | H | Lung, lower lobe (left)         | <a href="https://ictvslidewp01.usb.ch/OlyViaWeb/Html5Viewer?dbId=798403c7-6d3e-4d97-a412-5bc0acd1705f&amp;recordId=43331&amp;layerId=10001&amp;x=310&amp;y=0&amp;scale=3.5073198064887814&amp;angle=0&amp;vw=1540&amp;vh=868">https://ictvslidewp01.usb.ch/OlyViaWeb/Html5Viewer?dbId=798403c7-6d3e-4d97-a412-5bc0acd1705f&amp;recordId=43331&amp;layerId=10001&amp;x=310&amp;y=0&amp;scale=3.5073198064887814&amp;angle=0&amp;vw=1540&amp;vh=868</a>                                                               |
|    | I | Bone marrow                     | <a href="https://ictvslidewp01.usb.ch/OlyViaWeb/Html5Viewer?dbId=798403c7-6d3e-4d97-a412-5bc0acd1705f&amp;recordId=43336&amp;layerId=10001&amp;x=180&amp;y=0&amp;scale=3.635215495734256&amp;angle=0&amp;vw=1540&amp;vh=868">https://ictvslidewp01.usb.ch/OlyViaWeb/Html5Viewer?dbId=798403c7-6d3e-4d97-a412-5bc0acd1705f&amp;recordId=43336&amp;layerId=10001&amp;x=180&amp;y=0&amp;scale=3.635215495734256&amp;angle=0&amp;vw=1540&amp;vh=868</a>                                                                 |
| 10 | A | Liver and cystic duct           | <a href="https://ictvslidewp01.usb.ch/OlyViaWeb/Html5Viewer?dbId=798403c7-6d3e-4d97-a412-5bc0acd1705f&amp;recordId=43341&amp;layerId=10001&amp;x=197&amp;y=0&amp;scale=4.144550448106389&amp;angle=0&amp;vw=1540&amp;vh=868">https://ictvslidewp01.usb.ch/OlyViaWeb/Html5Viewer?dbId=798403c7-6d3e-4d97-a412-5bc0acd1705f&amp;recordId=43341&amp;layerId=10001&amp;x=197&amp;y=0&amp;scale=4.144550448106389&amp;angle=0&amp;vw=1540&amp;vh=868</a>                                                                 |
|    | B | Myocardium (septum)             | <a href="https://ictvslidewp01.usb.ch/OlyViaWeb/Html5Viewer?dbId=798403c7-6d3e-4d97-a412-5bc0acd1705f&amp;recordId=43346&amp;layerId=10001&amp;x=166&amp;y=0&amp;scale=3.5903700113103895&amp;angle=0&amp;vw=1540&amp;vh=868">https://ictvslidewp01.usb.ch/OlyViaWeb/Html5Viewer?dbId=798403c7-6d3e-4d97-a412-5bc0acd1705f&amp;recordId=43346&amp;layerId=10001&amp;x=166&amp;y=0&amp;scale=3.5903700113103895&amp;angle=0&amp;vw=1540&amp;vh=868</a>                                                               |
|    | C | Myocardium (septum) (Congo red) | <a href="https://ictvslidewp01.usb.ch/OlyViaWeb/Html5Viewer?dbId=798403c7-6d3e-4d97-a412-5bc0acd1705f&amp;recordId=43351&amp;layerId=10001&amp;x=167&amp;y=0&amp;scale=3.4762366634335597&amp;angle=0&amp;vw=1540&amp;vh=868">https://ictvslidewp01.usb.ch/OlyViaWeb/Html5Viewer?dbId=798403c7-6d3e-4d97-a412-5bc0acd1705f&amp;recordId=43351&amp;layerId=10001&amp;x=167&amp;y=0&amp;scale=3.4762366634335597&amp;angle=0&amp;vw=1540&amp;vh=868</a>                                                               |
|    | D | Kidney (PAS)                    | <a href="https://ictvslidewp01.usb.ch/OlyViaWeb/Html5Viewer?dbId=798403c7-6d3e-4d97-a412-5bc0acd1705f&amp;recordId=43356&amp;layerId=10001&amp;x=292&amp;y=0&amp;scale=2.1933255026601257&amp;angle=0&amp;vw=1540&amp;vh=868">https://ictvslidewp01.usb.ch/OlyViaWeb/Html5Viewer?dbId=798403c7-6d3e-4d97-a412-5bc0acd1705f&amp;recordId=43356&amp;layerId=10001&amp;x=292&amp;y=0&amp;scale=2.1933255026601257&amp;angle=0&amp;vw=1540&amp;vh=868</a>                                                               |
|    | E | Lung, middle lobe (right)       | <a href="https://ictvslidewp01.usb.ch/OlyViaWeb/Html5Viewer?dbId=798403c7-6d3e-4d97-a412-5bc0acd1705f&amp;recordId=43361&amp;layerId=10001&amp;x=50&amp;y=0&amp;scale=5.200219983384233&amp;angle=0&amp;vw=1540&amp;vh=868">https://ictvslidewp01.usb.ch/OlyViaWeb/Html5Viewer?dbId=798403c7-6d3e-4d97-a412-5bc0acd1705f&amp;recordId=43361&amp;layerId=10001&amp;x=50&amp;y=0&amp;scale=5.200219983384233&amp;angle=0&amp;vw=1540&amp;vh=868</a>                                                                   |
|    | F | Lung, lower lobe (right)        | <a href="https://ictvslidewp01.usb.ch/OlyViaWeb/Html5Viewer?dbId=798403c7-6d3e-4d97-a412-5bc0acd1705f&amp;recordId=43366&amp;layerId=10001&amp;x=423&amp;y=0&amp;scale=1.8330363624364811&amp;angle=0&amp;vw=1540&amp;vh=868">https://ictvslidewp01.usb.ch/OlyViaWeb/Html5Viewer?dbId=798403c7-6d3e-4d97-a412-5bc0acd1705f&amp;recordId=43366&amp;layerId=10001&amp;x=423&amp;y=0&amp;scale=1.8330363624364811&amp;angle=0&amp;vw=1540&amp;vh=868</a>                                                               |
|    | G | Lung, upper lobe (left)         | <a href="https://ictvslidewp01.usb.ch/OlyViaWeb/Html5Viewer?dbId=798403c7-6d3e-4d97-a412-5bc0acd1705f&amp;recordId=43371&amp;layerId=10001&amp;x=351&amp;y=0&amp;scale=1.7678348382990571&amp;angle=0&amp;vw=1540&amp;vh=868">https://ictvslidewp01.usb.ch/OlyViaWeb/Html5Viewer?dbId=798403c7-6d3e-4d97-a412-5bc0acd1705f&amp;recordId=43371&amp;layerId=10001&amp;x=351&amp;y=0&amp;scale=1.7678348382990571&amp;angle=0&amp;vw=1540&amp;vh=868</a>                                                               |
|    | H | Lung, lower lobe (left)         | <a href="https://ictvslidewp01.usb.ch/OlyViaWeb/Html5Viewer?dbId=798403c7-6d3e-4d97-a412-5bc0acd1705f&amp;recordId=43376&amp;layerId=10001&amp;x=503.6324670929184&amp;y=32.54261062503866&amp;scale=2.044381604860057&amp;angle=0&amp;vw=1540&amp;vh=868">https://ictvslidewp01.usb.ch/OlyViaWeb/Html5Viewer?dbId=798403c7-6d3e-4d97-a412-5bc0acd1705f&amp;recordId=43376&amp;layerId=10001&amp;x=503.6324670929184&amp;y=32.54261062503866&amp;scale=2.044381604860057&amp;angle=0&amp;vw=1540&amp;vh=868</a>     |
| 11 | A | Liver                           | <a href="https://ictvslidewp01.usb.ch/OlyViaWeb/Html5Viewer?dbId=798403c7-6d3e-4d97-a412-5bc0acd1705f&amp;recordId=43381&amp;layerId=10001&amp;x=227&amp;y=0&amp;scale=2.416276111044659&amp;angle=0&amp;vw=1540&amp;vh=868">https://ictvslidewp01.usb.ch/OlyViaWeb/Html5Viewer?dbId=798403c7-6d3e-4d97-a412-5bc0acd1705f&amp;recordId=43381&amp;layerId=10001&amp;x=227&amp;y=0&amp;scale=2.416276111044659&amp;angle=0&amp;vw=1540&amp;vh=868</a>                                                                 |
|    | B | Myocardium (anterior wall)      | <a href="https://ictvslidewp01.usb.ch/OlyViaWeb/Html5Viewer?dbId=798403c7-6d3e-4d97-a412-5bc0acd1705f&amp;recordId=43386&amp;layerId=10001&amp;x=0&amp;y=72&amp;scale=4.647522044607912&amp;angle=0&amp;vw=1540&amp;vh=868">https://ictvslidewp01.usb.ch/OlyViaWeb/Html5Viewer?dbId=798403c7-6d3e-4d97-a412-5bc0acd1705f&amp;recordId=43386&amp;layerId=10001&amp;x=0&amp;y=72&amp;scale=4.647522044607912&amp;angle=0&amp;vw=1540&amp;vh=868</a>                                                                   |
|    | C | Kidney (PAS)                    | <a href="https://ictvslidewp01.usb.ch/OlyViaWeb/Html5Viewer?dbId=798403c7-6d3e-4d97-a412-5bc0acd1705f&amp;recordId=43391&amp;layerId=10001&amp;x=261&amp;y=0&amp;scale=3.5242860881357005&amp;angle=0&amp;vw=1540&amp;vh=868">https://ictvslidewp01.usb.ch/OlyViaWeb/Html5Viewer?dbId=798403c7-6d3e-4d97-a412-5bc0acd1705f&amp;recordId=43391&amp;layerId=10001&amp;x=261&amp;y=0&amp;scale=3.5242860881357005&amp;angle=0&amp;vw=1540&amp;vh=868</a>                                                               |
|    | D | Lung, upper lobe (right)        | <a href="https://ictvslidewp01.usb.ch/OlyViaWeb/Html5Viewer?dbId=798403c7-6d3e-4d97-a412-5bc0acd1705f&amp;recordId=43396&amp;layerId=10001&amp;x=-497.1394262643262&amp;y=-732.7189460789357&amp;scale=5.484281098202725&amp;angle=0&amp;vw=1540&amp;vh=868">https://ictvslidewp01.usb.ch/OlyViaWeb/Html5Viewer?dbId=798403c7-6d3e-4d97-a412-5bc0acd1705f&amp;recordId=43396&amp;layerId=10001&amp;x=-497.1394262643262&amp;y=-732.7189460789357&amp;scale=5.484281098202725&amp;angle=0&amp;vw=1540&amp;vh=868</a> |

|    |   |                                             |                                                                                                                                                                                                                                                                                                                                                                                                                                                                                                                         |
|----|---|---------------------------------------------|-------------------------------------------------------------------------------------------------------------------------------------------------------------------------------------------------------------------------------------------------------------------------------------------------------------------------------------------------------------------------------------------------------------------------------------------------------------------------------------------------------------------------|
|    | E | Lung, lower lobe (right)                    | <a href="https://ictvslidewp01.usb.ch/OlyViaWeb/Html5Viewer?dbId=798403c7-6d3e-4d97-a412-5bc0acd1705f&amp;recordId=43401&amp;layerId=10001&amp;x=73&amp;y=0&amp;scale=2.9994870548851273&amp;angle=0&amp;vw=1540&amp;vh=868">https://ictvslidewp01.usb.ch/OlyViaWeb/Html5Viewer?dbId=798403c7-6d3e-4d97-a412-5bc0acd1705f&amp;recordId=43401&amp;layerId=10001&amp;x=73&amp;y=0&amp;scale=2.9994870548851273&amp;angle=0&amp;vw=1540&amp;vh=868</a>                                                                     |
|    | F | Lung, lower lobe (left)                     | <a href="https://ictvslidewp01.usb.ch/OlyViaWeb/Html5Viewer?dbId=798403c7-6d3e-4d97-a412-5bc0acd1705f&amp;recordId=43406&amp;layerId=10001&amp;x=325&amp;y=0&amp;scale=2.0649382027692593&amp;angle=0&amp;vw=1540&amp;vh=868">https://ictvslidewp01.usb.ch/OlyViaWeb/Html5Viewer?dbId=798403c7-6d3e-4d97-a412-5bc0acd1705f&amp;recordId=43406&amp;layerId=10001&amp;x=325&amp;y=0&amp;scale=2.0649382027692593&amp;angle=0&amp;vw=1540&amp;vh=868</a>                                                                   |
|    | G | Lung, lower lobe (left)                     | <a href="https://ictvslidewp01.usb.ch/OlyViaWeb/Html5Viewer?dbId=798403c7-6d3e-4d97-a412-5bc0acd1705f&amp;recordId=43411&amp;layerId=10001&amp;x=168.3466653500002&amp;y=-413.2478663200002&amp;scale=4.219239299978566&amp;angle=0&amp;vw=1540&amp;vh=868">https://ictvslidewp01.usb.ch/OlyViaWeb/Html5Viewer?dbId=798403c7-6d3e-4d97-a412-5bc0acd1705f&amp;recordId=43411&amp;layerId=10001&amp;x=168.3466653500002&amp;y=-413.2478663200002&amp;scale=4.219239299978566&amp;angle=0&amp;vw=1540&amp;vh=868</a>       |
|    | H | Spleen                                      | <a href="https://ictvslidewp01.usb.ch/OlyViaWeb/Html5Viewer?dbId=798403c7-6d3e-4d97-a412-5bc0acd1705f&amp;recordId=43416&amp;layerId=10001&amp;x=338&amp;y=0&amp;scale=2.587816041086797&amp;angle=0&amp;vw=1540&amp;vh=868">https://ictvslidewp01.usb.ch/OlyViaWeb/Html5Viewer?dbId=798403c7-6d3e-4d97-a412-5bc0acd1705f&amp;recordId=43416&amp;layerId=10001&amp;x=338&amp;y=0&amp;scale=2.587816041086797&amp;angle=0&amp;vw=1540&amp;vh=868</a>                                                                     |
|    | I | Bone marrow                                 | <a href="https://ictvslidewp01.usb.ch/OlyViaWeb/Html5Viewer?dbId=798403c7-6d3e-4d97-a412-5bc0acd1705f&amp;recordId=43421&amp;layerId=10001&amp;x=195&amp;y=0&amp;scale=4.473686329776525&amp;angle=0&amp;vw=1540&amp;vh=868">https://ictvslidewp01.usb.ch/OlyViaWeb/Html5Viewer?dbId=798403c7-6d3e-4d97-a412-5bc0acd1705f&amp;recordId=43421&amp;layerId=10001&amp;x=195&amp;y=0&amp;scale=4.473686329776525&amp;angle=0&amp;vw=1540&amp;vh=868</a>                                                                     |
|    | J | Skin                                        | <a href="https://ictvslidewp01.usb.ch/OlyViaWeb/Html5Viewer?dbId=798403c7-6d3e-4d97-a412-5bc0acd1705f&amp;recordId=43426&amp;layerId=10001&amp;x=76&amp;y=0&amp;scale=5.225042619481512&amp;angle=0&amp;vw=1540&amp;vh=868">https://ictvslidewp01.usb.ch/OlyViaWeb/Html5Viewer?dbId=798403c7-6d3e-4d97-a412-5bc0acd1705f&amp;recordId=43426&amp;layerId=10001&amp;x=76&amp;y=0&amp;scale=5.225042619481512&amp;angle=0&amp;vw=1540&amp;vh=868</a>                                                                       |
|    |   |                                             |                                                                                                                                                                                                                                                                                                                                                                                                                                                                                                                         |
| 12 | A | Liver                                       | <a href="https://ictvslidewp01.usb.ch/OlyViaWeb/Html5Viewer?dbId=798403c7-6d3e-4d97-a412-5bc0acd1705f&amp;recordId=43431&amp;layerId=10001&amp;x=94.57590000000084&amp;y=22.338599999998678&amp;scale=4.647193171730967&amp;angle=0&amp;vw=1540&amp;vh=868">https://ictvslidewp01.usb.ch/OlyViaWeb/Html5Viewer?dbId=798403c7-6d3e-4d97-a412-5bc0acd1705f&amp;recordId=43431&amp;layerId=10001&amp;x=94.57590000000084&amp;y=22.338599999998678&amp;scale=4.647193171730967&amp;angle=0&amp;vw=1540&amp;vh=868</a>       |
|    | B | Myocardium (left anterior + posterior wall) | <a href="https://ictvslidewp01.usb.ch/OlyViaWeb/Html5Viewer?dbId=798403c7-6d3e-4d97-a412-5bc0acd1705f&amp;recordId=43436&amp;layerId=10001&amp;x=447.51005398404567&amp;y=180.59241022206868&amp;scale=1.503547994116891&amp;angle=0&amp;vw=1540&amp;vh=868">https://ictvslidewp01.usb.ch/OlyViaWeb/Html5Viewer?dbId=798403c7-6d3e-4d97-a412-5bc0acd1705f&amp;recordId=43436&amp;layerId=10001&amp;x=447.51005398404567&amp;y=180.59241022206868&amp;scale=1.503547994116891&amp;angle=0&amp;vw=1540&amp;vh=868</a>     |
|    | C | Kidney (PAS)                                | <a href="https://ictvslidewp01.usb.ch/OlyViaWeb/Html5Viewer?dbId=798403c7-6d3e-4d97-a412-5bc0acd1705f&amp;recordId=43441&amp;layerId=10001&amp;x=156&amp;y=0&amp;scale=2.5575544122555622&amp;angle=0&amp;vw=1540&amp;vh=868">https://ictvslidewp01.usb.ch/OlyViaWeb/Html5Viewer?dbId=798403c7-6d3e-4d97-a412-5bc0acd1705f&amp;recordId=43441&amp;layerId=10001&amp;x=156&amp;y=0&amp;scale=2.5575544122555622&amp;angle=0&amp;vw=1540&amp;vh=868</a>                                                                   |
|    | D | Lung, upper and lower lobe (right)          | <a href="https://ictvslidewp01.usb.ch/OlyViaWeb/Html5Viewer?dbId=798403c7-6d3e-4d97-a412-5bc0acd1705f&amp;recordId=43772&amp;layerId=10001&amp;x=425.48230100000114&amp;y=-117.45545100000061&amp;scale=2.2815089960260777&amp;angle=0&amp;vw=1540&amp;vh=868">https://ictvslidewp01.usb.ch/OlyViaWeb/Html5Viewer?dbId=798403c7-6d3e-4d97-a412-5bc0acd1705f&amp;recordId=43772&amp;layerId=10001&amp;x=425.48230100000114&amp;y=-117.45545100000061&amp;scale=2.2815089960260777&amp;angle=0&amp;vw=1540&amp;vh=868</a> |
|    | E | Lung, upper and lower lobe (left)           | <a href="https://ictvslidewp01.usb.ch/OlyViaWeb/Html5Viewer?dbId=798403c7-6d3e-4d97-a412-5bc0acd1705f&amp;recordId=43451&amp;layerId=10001&amp;x=128&amp;y=0&amp;scale=4.465460245370417&amp;angle=0&amp;vw=1540&amp;vh=868">https://ictvslidewp01.usb.ch/OlyViaWeb/Html5Viewer?dbId=798403c7-6d3e-4d97-a412-5bc0acd1705f&amp;recordId=43451&amp;layerId=10001&amp;x=128&amp;y=0&amp;scale=4.465460245370417&amp;angle=0&amp;vw=1540&amp;vh=868</a>                                                                     |
|    | F | Lung, upper lobe (left)                     | <a href="https://ictvslidewp01.usb.ch/OlyViaWeb/Html5Viewer?dbId=798403c7-6d3e-4d97-a412-5bc0acd1705f&amp;recordId=43456&amp;layerId=10001&amp;x=256&amp;y=0&amp;scale=2.1292653245048343&amp;angle=0&amp;vw=1540&amp;vh=868">https://ictvslidewp01.usb.ch/OlyViaWeb/Html5Viewer?dbId=798403c7-6d3e-4d97-a412-5bc0acd1705f&amp;recordId=43456&amp;layerId=10001&amp;x=256&amp;y=0&amp;scale=2.1292653245048343&amp;angle=0&amp;vw=1540&amp;vh=868</a>                                                                   |
|    | G | Lung, lower lobe (left)                     | <a href="https://ictvslidewp01.usb.ch/OlyViaWeb/Html5Viewer?dbId=798403c7-6d3e-4d97-a412-5bc0acd1705f&amp;recordId=43461&amp;layerId=10001&amp;x=274&amp;y=0&amp;scale=2.38006897881365&amp;angle=0&amp;vw=1540&amp;vh=868">https://ictvslidewp01.usb.ch/OlyViaWeb/Html5Viewer?dbId=798403c7-6d3e-4d97-a412-5bc0acd1705f&amp;recordId=43461&amp;layerId=10001&amp;x=274&amp;y=0&amp;scale=2.38006897881365&amp;angle=0&amp;vw=1540&amp;vh=868</a>                                                                       |
|    |   |                                             |                                                                                                                                                                                                                                                                                                                                                                                                                                                                                                                         |

|    |   |                                             |                                                                                                                                                                                                                                                                                                                                                                                                                                                                                                                       |
|----|---|---------------------------------------------|-----------------------------------------------------------------------------------------------------------------------------------------------------------------------------------------------------------------------------------------------------------------------------------------------------------------------------------------------------------------------------------------------------------------------------------------------------------------------------------------------------------------------|
| 13 | A | Liver                                       | <a href="https://ictvslidewp01.usb.ch/OlyViaWeb/Html5Viewer?dbId=798403c7-6d3e-4d97-a412-5bc0acd1705f&amp;recordId=43466&amp;layerId=10001&amp;x=157&amp;y=0&amp;scale=2.549982212735681&amp;angle=0&amp;vw=1540&amp;vh=868">https://ictvslidewp01.usb.ch/OlyViaWeb/Html5Viewer?dbId=798403c7-6d3e-4d97-a412-5bc0acd1705f&amp;recordId=43466&amp;layerId=10001&amp;x=157&amp;y=0&amp;scale=2.549982212735681&amp;angle=0&amp;vw=1540&amp;vh=868</a>                                                                   |
|    | B | Myocardium (left anterior + posterior wall) | <a href="https://ictvslidewp01.usb.ch/OlyViaWeb/Html5Viewer?dbId=798403c7-6d3e-4d97-a412-5bc0acd1705f&amp;recordId=43471&amp;layerId=10001&amp;x=155&amp;y=0&amp;scale=4.608546866736491&amp;angle=0&amp;vw=1540&amp;vh=868">https://ictvslidewp01.usb.ch/OlyViaWeb/Html5Viewer?dbId=798403c7-6d3e-4d97-a412-5bc0acd1705f&amp;recordId=43471&amp;layerId=10001&amp;x=155&amp;y=0&amp;scale=4.608546866736491&amp;angle=0&amp;vw=1540&amp;vh=868</a>                                                                   |
|    | C | Kidney (PAS)                                | <a href="https://ictvslidewp01.usb.ch/OlyViaWeb/Html5Viewer?dbId=798403c7-6d3e-4d97-a412-5bc0acd1705f&amp;recordId=43477&amp;layerId=10001&amp;x=130&amp;y=0&amp;scale=4.434669806613846&amp;angle=0&amp;vw=1540&amp;vh=868">https://ictvslidewp01.usb.ch/OlyViaWeb/Html5Viewer?dbId=798403c7-6d3e-4d97-a412-5bc0acd1705f&amp;recordId=43477&amp;layerId=10001&amp;x=130&amp;y=0&amp;scale=4.434669806613846&amp;angle=0&amp;vw=1540&amp;vh=868</a>                                                                   |
|    | D | Lung, upper and lower lobe (right)          | <a href="https://ictvslidewp01.usb.ch/OlyViaWeb/Html5Viewer?dbId=798403c7-6d3e-4d97-a412-5bc0acd1705f&amp;recordId=43482&amp;layerId=10001&amp;x=210&amp;y=0&amp;scale=4.181833579554543&amp;angle=0&amp;vw=1540&amp;vh=868">https://ictvslidewp01.usb.ch/OlyViaWeb/Html5Viewer?dbId=798403c7-6d3e-4d97-a412-5bc0acd1705f&amp;recordId=43482&amp;layerId=10001&amp;x=210&amp;y=0&amp;scale=4.181833579554543&amp;angle=0&amp;vw=1540&amp;vh=868</a>                                                                   |
|    | E | Lung, lower lobe (right)                    | <a href="https://ictvslidewp01.usb.ch/OlyViaWeb/Html5Viewer?dbId=798403c7-6d3e-4d97-a412-5bc0acd1705f&amp;recordId=43487&amp;layerId=10001&amp;x=210&amp;y=0&amp;scale=3.744184675007372&amp;angle=0&amp;vw=1540&amp;vh=868">https://ictvslidewp01.usb.ch/OlyViaWeb/Html5Viewer?dbId=798403c7-6d3e-4d97-a412-5bc0acd1705f&amp;recordId=43487&amp;layerId=10001&amp;x=210&amp;y=0&amp;scale=3.744184675007372&amp;angle=0&amp;vw=1540&amp;vh=868</a>                                                                   |
|    | F | Lung, middle lobe (right)                   | <a href="https://ictvslidewp01.usb.ch/OlyViaWeb/Html5Viewer?dbId=798403c7-6d3e-4d97-a412-5bc0acd1705f&amp;recordId=43492&amp;layerId=10001&amp;x=8&amp;y=0&amp;scale=5.438742917283664&amp;angle=0&amp;vw=1540&amp;vh=868">https://ictvslidewp01.usb.ch/OlyViaWeb/Html5Viewer?dbId=798403c7-6d3e-4d97-a412-5bc0acd1705f&amp;recordId=43492&amp;layerId=10001&amp;x=8&amp;y=0&amp;scale=5.438742917283664&amp;angle=0&amp;vw=1540&amp;vh=868</a>                                                                       |
|    | G | Lung, upper and lower lobe (left)           | <a href="https://ictvslidewp01.usb.ch/OlyViaWeb/Html5Viewer?dbId=798403c7-6d3e-4d97-a412-5bc0acd1705f&amp;recordId=43497&amp;layerId=10001&amp;x=264.74655766741887&amp;y=-72.08710279408399&amp;scale=2.1402720451841213&amp;angle=0&amp;vw=1540&amp;vh=868">https://ictvslidewp01.usb.ch/OlyViaWeb/Html5Viewer?dbId=798403c7-6d3e-4d97-a412-5bc0acd1705f&amp;recordId=43497&amp;layerId=10001&amp;x=264.74655766741887&amp;y=-72.08710279408399&amp;scale=2.1402720451841213&amp;angle=0&amp;vw=1540&amp;vh=868</a> |
|    |   |                                             |                                                                                                                                                                                                                                                                                                                                                                                                                                                                                                                       |
| 14 | A | Myocardium                                  | <a href="https://ictvslidewp01.usb.ch/OlyViaWeb/Html5Viewer?dbId=798403c7-6d3e-4d97-a412-5bc0acd1705f&amp;recordId=43502&amp;layerId=10001&amp;x=204&amp;y=0&amp;scale=2.533844189016603&amp;angle=0&amp;vw=1540&amp;vh=868">https://ictvslidewp01.usb.ch/OlyViaWeb/Html5Viewer?dbId=798403c7-6d3e-4d97-a412-5bc0acd1705f&amp;recordId=43502&amp;layerId=10001&amp;x=204&amp;y=0&amp;scale=2.533844189016603&amp;angle=0&amp;vw=1540&amp;vh=868</a>                                                                   |
|    | B | Lung, upper lobe (right)                    | <a href="https://ictvslidewp01.usb.ch/OlyViaWeb/Html5Viewer?dbId=798403c7-6d3e-4d97-a412-5bc0acd1705f&amp;recordId=43507&amp;layerId=10001&amp;x=31&amp;y=0&amp;scale=4.768412017167382&amp;angle=0&amp;vw=1540&amp;vh=868">https://ictvslidewp01.usb.ch/OlyViaWeb/Html5Viewer?dbId=798403c7-6d3e-4d97-a412-5bc0acd1705f&amp;recordId=43507&amp;layerId=10001&amp;x=31&amp;y=0&amp;scale=4.768412017167382&amp;angle=0&amp;vw=1540&amp;vh=868</a>                                                                     |
|    | C | Lung, lower lobe (right)                    | <a href="https://ictvslidewp01.usb.ch/OlyViaWeb/Html5Viewer?dbId=798403c7-6d3e-4d97-a412-5bc0acd1705f&amp;recordId=43512&amp;layerId=10001&amp;x=313&amp;y=0&amp;scale=1.8921786520202665&amp;angle=0&amp;vw=1540&amp;vh=868">https://ictvslidewp01.usb.ch/OlyViaWeb/Html5Viewer?dbId=798403c7-6d3e-4d97-a412-5bc0acd1705f&amp;recordId=43512&amp;layerId=10001&amp;x=313&amp;y=0&amp;scale=1.8921786520202665&amp;angle=0&amp;vw=1540&amp;vh=868</a>                                                                 |
|    | D | Lung, lower lobe (right)                    | <a href="https://ictvslidewp01.usb.ch/OlyViaWeb/Html5Viewer?dbId=798403c7-6d3e-4d97-a412-5bc0acd1705f&amp;recordId=43517&amp;layerId=10001&amp;x=224&amp;y=0&amp;scale=3.950820983758123&amp;angle=0&amp;vw=1540&amp;vh=868">https://ictvslidewp01.usb.ch/OlyViaWeb/Html5Viewer?dbId=798403c7-6d3e-4d97-a412-5bc0acd1705f&amp;recordId=43517&amp;layerId=10001&amp;x=224&amp;y=0&amp;scale=3.950820983758123&amp;angle=0&amp;vw=1540&amp;vh=868</a>                                                                   |
|    | E | Lung, upper lobe (left)                     | <a href="https://ictvslidewp01.usb.ch/OlyViaWeb/Html5Viewer?dbId=798403c7-6d3e-4d97-a412-5bc0acd1705f&amp;recordId=43522&amp;layerId=10001&amp;x=267&amp;y=0&amp;scale=2.3691572842033435&amp;angle=0&amp;vw=1540&amp;vh=868">https://ictvslidewp01.usb.ch/OlyViaWeb/Html5Viewer?dbId=798403c7-6d3e-4d97-a412-5bc0acd1705f&amp;recordId=43522&amp;layerId=10001&amp;x=267&amp;y=0&amp;scale=2.3691572842033435&amp;angle=0&amp;vw=1540&amp;vh=868</a>                                                                 |
|    |   |                                             |                                                                                                                                                                                                                                                                                                                                                                                                                                                                                                                       |
| 15 | A | Myocardium                                  | <a href="https://ictvslidewp01.usb.ch/OlyViaWeb/Html5Viewer?dbId=798403c7-6d3e-4d97-a412-5bc0acd1705f&amp;recordId=43527&amp;layerId=10001&amp;x=107&amp;y=0&amp;scale=4.150084978428553&amp;angle=0&amp;vw=1540&amp;vh=868">https://ictvslidewp01.usb.ch/OlyViaWeb/Html5Viewer?dbId=798403c7-6d3e-4d97-a412-5bc0acd1705f&amp;recordId=43527&amp;layerId=10001&amp;x=107&amp;y=0&amp;scale=4.150084978428553&amp;angle=0&amp;vw=1540&amp;vh=868</a>                                                                   |
|    | A | Myocardium (Congo red)                      | <a href="https://ictvslidewp01.usb.ch/OlyViaWeb/Html5Viewer?dbId=798403c7-6d3e-4d97-a412-5bc0acd1705f&amp;recordId=43532&amp;layerId=10001&amp;x=156&amp;y=0&amp;scale=3.681744374855022&amp;angle=0&amp;vw=1540&amp;vh=868">https://ictvslidewp01.usb.ch/OlyViaWeb/Html5Viewer?dbId=798403c7-6d3e-4d97-a412-5bc0acd1705f&amp;recordId=43532&amp;layerId=10001&amp;x=156&amp;y=0&amp;scale=3.681744374855022&amp;angle=0&amp;vw=1540&amp;vh=868</a>                                                                   |



|    |   |                                                |                                                                                                                                                                                                                                                                                                                                                                                                                                                       |
|----|---|------------------------------------------------|-------------------------------------------------------------------------------------------------------------------------------------------------------------------------------------------------------------------------------------------------------------------------------------------------------------------------------------------------------------------------------------------------------------------------------------------------------|
|    | B | Lung, upper lobe (right)                       | <a href="https://ictvslidewp01.usb.ch/OlyViaWeb/Html5Viewer?dbId=798403c7-6d3e-4d97-a412-5bc0acd1705f&amp;recordId=43537&amp;layerId=10001&amp;x=164&amp;y=0&amp;scale=2.389847278984728&amp;angle=0&amp;vw=1540&amp;vh=868">https://ictvslidewp01.usb.ch/OlyViaWeb/Html5Viewer?dbId=798403c7-6d3e-4d97-a412-5bc0acd1705f&amp;recordId=43537&amp;layerId=10001&amp;x=164&amp;y=0&amp;scale=2.389847278984728&amp;angle=0&amp;vw=1540&amp;vh=868</a>   |
|    | C | Lung, lower lobe (right)                       | <a href="https://ictvslidewp01.usb.ch/OlyViaWeb/Html5Viewer?dbId=798403c7-6d3e-4d97-a412-5bc0acd1705f&amp;recordId=43542&amp;layerId=10001&amp;x=0&amp;y=0&amp;scale=3.2345508844475072&amp;angle=0&amp;vw=1540&amp;vh=868">https://ictvslidewp01.usb.ch/OlyViaWeb/Html5Viewer?dbId=798403c7-6d3e-4d97-a412-5bc0acd1705f&amp;recordId=43542&amp;layerId=10001&amp;x=0&amp;y=0&amp;scale=3.2345508844475072&amp;angle=0&amp;vw=1540&amp;vh=868</a>     |
|    | D | Lung, upper lobe (left)                        | <a href="https://ictvslidewp01.usb.ch/OlyViaWeb/Html5Viewer?dbId=798403c7-6d3e-4d97-a412-5bc0acd1705f&amp;recordId=43547&amp;layerId=10001&amp;x=300&amp;y=0&amp;scale=2.1977291608972584&amp;angle=0&amp;vw=1540&amp;vh=868">https://ictvslidewp01.usb.ch/OlyViaWeb/Html5Viewer?dbId=798403c7-6d3e-4d97-a412-5bc0acd1705f&amp;recordId=43547&amp;layerId=10001&amp;x=300&amp;y=0&amp;scale=2.1977291608972584&amp;angle=0&amp;vw=1540&amp;vh=868</a> |
|    | E | Lung, lower lobe (left)                        | <a href="https://ictvslidewp01.usb.ch/OlyViaWeb/Html5Viewer?dbId=798403c7-6d3e-4d97-a412-5bc0acd1705f&amp;recordId=43552&amp;layerId=10001&amp;x=0&amp;y=44&amp;scale=5.568243610657967&amp;angle=0&amp;vw=1540&amp;vh=868">https://ictvslidewp01.usb.ch/OlyViaWeb/Html5Viewer?dbId=798403c7-6d3e-4d97-a412-5bc0acd1705f&amp;recordId=43552&amp;layerId=10001&amp;x=0&amp;y=44&amp;scale=5.568243610657967&amp;angle=0&amp;vw=1540&amp;vh=868</a>     |
| 16 | A | Liver                                          | <a href="https://ictvslidewp01.usb.ch/OlyViaWeb/Html5Viewer?dbId=798403c7-6d3e-4d97-a412-5bc0acd1705f&amp;recordId=43557&amp;layerId=10001&amp;x=269&amp;y=0&amp;scale=2.2755089501495105&amp;angle=0&amp;vw=1540&amp;vh=868">https://ictvslidewp01.usb.ch/OlyViaWeb/Html5Viewer?dbId=798403c7-6d3e-4d97-a412-5bc0acd1705f&amp;recordId=43557&amp;layerId=10001&amp;x=269&amp;y=0&amp;scale=2.2755089501495105&amp;angle=0&amp;vw=1540&amp;vh=868</a> |
|    | B | Myocardium, anterior and posterior wall (left) | <a href="https://ictvslidewp01.usb.ch/OlyViaWeb/Html5Viewer?dbId=798403c7-6d3e-4d97-a412-5bc0acd1705f&amp;recordId=43562&amp;layerId=10001&amp;x=197&amp;y=0&amp;scale=4.087974759228427&amp;angle=0&amp;vw=1540&amp;vh=868">https://ictvslidewp01.usb.ch/OlyViaWeb/Html5Viewer?dbId=798403c7-6d3e-4d97-a412-5bc0acd1705f&amp;recordId=43562&amp;layerId=10001&amp;x=197&amp;y=0&amp;scale=4.087974759228427&amp;angle=0&amp;vw=1540&amp;vh=868</a>   |
|    | C | Kidney (PAS)                                   | <a href="https://ictvslidewp01.usb.ch/OlyViaWeb/Html5Viewer?dbId=798403c7-6d3e-4d97-a412-5bc0acd1705f&amp;recordId=43777&amp;layerId=10001&amp;x=149&amp;y=0&amp;scale=4.249328297557011&amp;angle=0&amp;vw=1540&amp;vh=868">https://ictvslidewp01.usb.ch/OlyViaWeb/Html5Viewer?dbId=798403c7-6d3e-4d97-a412-5bc0acd1705f&amp;recordId=43777&amp;layerId=10001&amp;x=149&amp;y=0&amp;scale=4.249328297557011&amp;angle=0&amp;vw=1540&amp;vh=868</a>   |
|    | D | Lung, upper and lower lobe (left)              | <a href="https://ictvslidewp01.usb.ch/OlyViaWeb/Html5Viewer?dbId=798403c7-6d3e-4d97-a412-5bc0acd1705f&amp;recordId=43572&amp;layerId=10001&amp;x=148&amp;y=0&amp;scale=4.7076968708290074&amp;angle=0&amp;vw=1540&amp;vh=868">https://ictvslidewp01.usb.ch/OlyViaWeb/Html5Viewer?dbId=798403c7-6d3e-4d97-a412-5bc0acd1705f&amp;recordId=43572&amp;layerId=10001&amp;x=148&amp;y=0&amp;scale=4.7076968708290074&amp;angle=0&amp;vw=1540&amp;vh=868</a> |
|    | E | Lung, upper and lower lobe (right)             | <a href="https://ictvslidewp01.usb.ch/OlyViaWeb/Html5Viewer?dbId=798403c7-6d3e-4d97-a412-5bc0acd1705f&amp;recordId=43577&amp;layerId=10001&amp;x=75&amp;y=0&amp;scale=4.657569850552306&amp;angle=0&amp;vw=1540&amp;vh=868">https://ictvslidewp01.usb.ch/OlyViaWeb/Html5Viewer?dbId=798403c7-6d3e-4d97-a412-5bc0acd1705f&amp;recordId=43577&amp;layerId=10001&amp;x=75&amp;y=0&amp;scale=4.657569850552306&amp;angle=0&amp;vw=1540&amp;vh=868</a>     |
|    | F | Lung, lower lobe (right)                       | <a href="https://ictvslidewp01.usb.ch/OlyViaWeb/Html5Viewer?dbId=798403c7-6d3e-4d97-a412-5bc0acd1705f&amp;recordId=43582&amp;layerId=10001&amp;x=370&amp;y=0&amp;scale=2.150198852365424&amp;angle=0&amp;vw=1540&amp;vh=868">https://ictvslidewp01.usb.ch/OlyViaWeb/Html5Viewer?dbId=798403c7-6d3e-4d97-a412-5bc0acd1705f&amp;recordId=43582&amp;layerId=10001&amp;x=370&amp;y=0&amp;scale=2.150198852365424&amp;angle=0&amp;vw=1540&amp;vh=868</a>   |
|    | G | Lung, upper lobe (right)                       | <a href="https://ictvslidewp01.usb.ch/OlyViaWeb/Html5Viewer?dbId=798403c7-6d3e-4d97-a412-5bc0acd1705f&amp;recordId=43587&amp;layerId=10001&amp;x=290&amp;y=0&amp;scale=2.0610501516514707&amp;angle=0&amp;vw=1540&amp;vh=868">https://ictvslidewp01.usb.ch/OlyViaWeb/Html5Viewer?dbId=798403c7-6d3e-4d97-a412-5bc0acd1705f&amp;recordId=43587&amp;layerId=10001&amp;x=290&amp;y=0&amp;scale=2.0610501516514707&amp;angle=0&amp;vw=1540&amp;vh=868</a> |
|    | H | Spleen                                         | <a href="https://ictvslidewp01.usb.ch/OlyViaWeb/Html5Viewer?dbId=798403c7-6d3e-4d97-a412-5bc0acd1705f&amp;recordId=43592&amp;layerId=10001&amp;x=315&amp;y=0&amp;scale=1.989791715170944&amp;angle=0&amp;vw=1540&amp;vh=868">https://ictvslidewp01.usb.ch/OlyViaWeb/Html5Viewer?dbId=798403c7-6d3e-4d97-a412-5bc0acd1705f&amp;recordId=43592&amp;layerId=10001&amp;x=315&amp;y=0&amp;scale=1.989791715170944&amp;angle=0&amp;vw=1540&amp;vh=868</a>   |
| 17 | A | Liver                                          | <a href="https://ictvslidewp01.usb.ch/OlyViaWeb/Html5Viewer?dbId=798403c7-6d3e-4d97-a412-5bc0acd1705f&amp;recordId=43597&amp;layerId=10001&amp;x=186&amp;y=0&amp;scale=2.644105712823808&amp;angle=0&amp;vw=1540&amp;vh=868">https://ictvslidewp01.usb.ch/OlyViaWeb/Html5Viewer?dbId=798403c7-6d3e-4d97-a412-5bc0acd1705f&amp;recordId=43597&amp;layerId=10001&amp;x=186&amp;y=0&amp;scale=2.644105712823808&amp;angle=0&amp;vw=1540&amp;vh=868</a>   |
|    | B | Myocardium, anterior and                       | <a href="https://ictvslidewp01.usb.ch/OlyViaWeb/Html5Viewer?dbId=798403c7-6d3e-4d97-a412-5bc0acd1705f&amp;recordId=43602&amp;layerId=10001&amp;x=86&amp;y=0&amp;scale=4.106407946407947&amp;angle=0&amp;vw=1540&amp;vh=868">https://ictvslidewp01.usb.ch/OlyViaWeb/Html5Viewer?dbId=798403c7-6d3e-4d97-a412-5bc0acd1705f&amp;recordId=43602&amp;layerId=10001&amp;x=86&amp;y=0&amp;scale=4.106407946407947&amp;angle=0&amp;vw=1540&amp;vh=868</a>     |

|    |   |                                                |                                                                                                                                                                                                                                                                                                                                                                                                                                                       |
|----|---|------------------------------------------------|-------------------------------------------------------------------------------------------------------------------------------------------------------------------------------------------------------------------------------------------------------------------------------------------------------------------------------------------------------------------------------------------------------------------------------------------------------|
|    |   | posterior wall (left)                          |                                                                                                                                                                                                                                                                                                                                                                                                                                                       |
|    | C | Kidney (PAS)                                   | <a href="https://ictvslidewp01.usb.ch/OlyViaWeb/Html5Viewer?dbId=798403c7-6d3e-4d97-a412-5bc0acd1705f&amp;recordId=43607&amp;layerId=10001&amp;x=244&amp;y=0&amp;scale=2.3846409752851913&amp;angle=0&amp;vw=1540&amp;vh=868">https://ictvslidewp01.usb.ch/OlyViaWeb/Html5Viewer?dbId=798403c7-6d3e-4d97-a412-5bc0acd1705f&amp;recordId=43607&amp;layerId=10001&amp;x=244&amp;y=0&amp;scale=2.3846409752851913&amp;angle=0&amp;vw=1540&amp;vh=868</a> |
|    | D | Lung, upper and lower lobe (right)             | <a href="https://ictvslidewp01.usb.ch/OlyViaWeb/Html5Viewer?dbId=798403c7-6d3e-4d97-a412-5bc0acd1705f&amp;recordId=43612&amp;layerId=10001&amp;x=190&amp;y=0&amp;scale=4.1221003033029415&amp;angle=0&amp;vw=1540&amp;vh=868">https://ictvslidewp01.usb.ch/OlyViaWeb/Html5Viewer?dbId=798403c7-6d3e-4d97-a412-5bc0acd1705f&amp;recordId=43612&amp;layerId=10001&amp;x=190&amp;y=0&amp;scale=4.1221003033029415&amp;angle=0&amp;vw=1540&amp;vh=868</a> |
|    | E | Lung, upper lobe (right)                       | <a href="https://ictvslidewp01.usb.ch/OlyViaWeb/Html5Viewer?dbId=798403c7-6d3e-4d97-a412-5bc0acd1705f&amp;recordId=43617&amp;layerId=10001&amp;x=193&amp;y=0&amp;scale=2.256697743383503&amp;angle=0&amp;vw=1540&amp;vh=868">https://ictvslidewp01.usb.ch/OlyViaWeb/Html5Viewer?dbId=798403c7-6d3e-4d97-a412-5bc0acd1705f&amp;recordId=43617&amp;layerId=10001&amp;x=193&amp;y=0&amp;scale=2.256697743383503&amp;angle=0&amp;vw=1540&amp;vh=868</a>   |
|    | F | Lung, lower lobe (right)                       | <a href="https://ictvslidewp01.usb.ch/OlyViaWeb/Html5Viewer?dbId=798403c7-6d3e-4d97-a412-5bc0acd1705f&amp;recordId=43622&amp;layerId=10001&amp;x=86&amp;y=0&amp;scale=2.7163795948803835&amp;angle=0&amp;vw=1540&amp;vh=868">https://ictvslidewp01.usb.ch/OlyViaWeb/Html5Viewer?dbId=798403c7-6d3e-4d97-a412-5bc0acd1705f&amp;recordId=43622&amp;layerId=10001&amp;x=86&amp;y=0&amp;scale=2.7163795948803835&amp;angle=0&amp;vw=1540&amp;vh=868</a>   |
|    | G | Lung, upper and lower lobe (left)              | <a href="https://ictvslidewp01.usb.ch/OlyViaWeb/Html5Viewer?dbId=798403c7-6d3e-4d97-a412-5bc0acd1705f&amp;recordId=43627&amp;layerId=10001&amp;x=0&amp;y=13&amp;scale=4.975390595421389&amp;angle=0&amp;vw=1540&amp;vh=868">https://ictvslidewp01.usb.ch/OlyViaWeb/Html5Viewer?dbId=798403c7-6d3e-4d97-a412-5bc0acd1705f&amp;recordId=43627&amp;layerId=10001&amp;x=0&amp;y=13&amp;scale=4.975390595421389&amp;angle=0&amp;vw=1540&amp;vh=868</a>     |
|    | H | Thrombus in aorta                              | <a href="https://ictvslidewp01.usb.ch/OlyViaWeb/Html5Viewer?dbId=798403c7-6d3e-4d97-a412-5bc0acd1705f&amp;recordId=43632&amp;layerId=10001&amp;x=0&amp;y=32&amp;scale=4.646672992038282&amp;angle=0&amp;vw=1540&amp;vh=868">https://ictvslidewp01.usb.ch/OlyViaWeb/Html5Viewer?dbId=798403c7-6d3e-4d97-a412-5bc0acd1705f&amp;recordId=43632&amp;layerId=10001&amp;x=0&amp;y=32&amp;scale=4.646672992038282&amp;angle=0&amp;vw=1540&amp;vh=868</a>     |
| 18 | A | Myocardium (left)                              | <a href="https://ictvslidewp01.usb.ch/OlyViaWeb/Html5Viewer?dbId=798403c7-6d3e-4d97-a412-5bc0acd1705f&amp;recordId=43637&amp;layerId=10001&amp;x=173&amp;y=0&amp;scale=4.000468084723335&amp;angle=0&amp;vw=1540&amp;vh=868">https://ictvslidewp01.usb.ch/OlyViaWeb/Html5Viewer?dbId=798403c7-6d3e-4d97-a412-5bc0acd1705f&amp;recordId=43637&amp;layerId=10001&amp;x=173&amp;y=0&amp;scale=4.000468084723335&amp;angle=0&amp;vw=1540&amp;vh=868</a>   |
|    | B | Lung, upper lobe (right)                       | <a href="https://ictvslidewp01.usb.ch/OlyViaWeb/Html5Viewer?dbId=798403c7-6d3e-4d97-a412-5bc0acd1705f&amp;recordId=43642&amp;layerId=10001&amp;x=180&amp;y=0&amp;scale=2.3358106190411116&amp;angle=0&amp;vw=1540&amp;vh=868">https://ictvslidewp01.usb.ch/OlyViaWeb/Html5Viewer?dbId=798403c7-6d3e-4d97-a412-5bc0acd1705f&amp;recordId=43642&amp;layerId=10001&amp;x=180&amp;y=0&amp;scale=2.3358106190411116&amp;angle=0&amp;vw=1540&amp;vh=868</a> |
|    | C | Lung, lower lobe (right)                       | <a href="https://ictvslidewp01.usb.ch/OlyViaWeb/Html5Viewer?dbId=798403c7-6d3e-4d97-a412-5bc0acd1705f&amp;recordId=43647&amp;layerId=10001&amp;x=31&amp;y=0&amp;scale=5.27546829372522&amp;angle=0&amp;vw=1540&amp;vh=868">https://ictvslidewp01.usb.ch/OlyViaWeb/Html5Viewer?dbId=798403c7-6d3e-4d97-a412-5bc0acd1705f&amp;recordId=43647&amp;layerId=10001&amp;x=31&amp;y=0&amp;scale=5.27546829372522&amp;angle=0&amp;vw=1540&amp;vh=868</a>       |
|    | D | Lung, upper lobe (left)                        | <a href="https://ictvslidewp01.usb.ch/OlyViaWeb/Html5Viewer?dbId=798403c7-6d3e-4d97-a412-5bc0acd1705f&amp;recordId=43652&amp;layerId=10001&amp;x=161&amp;y=0&amp;scale=2.389950094648081&amp;angle=0&amp;vw=1540&amp;vh=868">https://ictvslidewp01.usb.ch/OlyViaWeb/Html5Viewer?dbId=798403c7-6d3e-4d97-a412-5bc0acd1705f&amp;recordId=43652&amp;layerId=10001&amp;x=161&amp;y=0&amp;scale=2.389950094648081&amp;angle=0&amp;vw=1540&amp;vh=868</a>   |
|    | E | Lung, lower lobe (left)                        | <a href="https://ictvslidewp01.usb.ch/OlyViaWeb/Html5Viewer?dbId=798403c7-6d3e-4d97-a412-5bc0acd1705f&amp;recordId=43657&amp;layerId=10001&amp;x=277&amp;y=0&amp;scale=2.268887141733972&amp;angle=0&amp;vw=1540&amp;vh=868">https://ictvslidewp01.usb.ch/OlyViaWeb/Html5Viewer?dbId=798403c7-6d3e-4d97-a412-5bc0acd1705f&amp;recordId=43657&amp;layerId=10001&amp;x=277&amp;y=0&amp;scale=2.268887141733972&amp;angle=0&amp;vw=1540&amp;vh=868</a>   |
| 19 | A | Liver                                          | <a href="https://ictvslidewp01.usb.ch/OlyViaWeb/Html5Viewer?dbId=798403c7-6d3e-4d97-a412-5bc0acd1705f&amp;recordId=43662&amp;layerId=10001&amp;x=35&amp;y=0&amp;scale=4.494862043854681&amp;angle=0&amp;vw=1540&amp;vh=868">https://ictvslidewp01.usb.ch/OlyViaWeb/Html5Viewer?dbId=798403c7-6d3e-4d97-a412-5bc0acd1705f&amp;recordId=43662&amp;layerId=10001&amp;x=35&amp;y=0&amp;scale=4.494862043854681&amp;angle=0&amp;vw=1540&amp;vh=868</a>     |
|    | B | Myocardium, anterior and posterior wall (left) | <a href="https://ictvslidewp01.usb.ch/OlyViaWeb/Html5Viewer?dbId=798403c7-6d3e-4d97-a412-5bc0acd1705f&amp;recordId=43667&amp;layerId=10001&amp;x=0&amp;y=28&amp;scale=3.9363576909444004&amp;angle=0&amp;vw=1540&amp;vh=868">https://ictvslidewp01.usb.ch/OlyViaWeb/Html5Viewer?dbId=798403c7-6d3e-4d97-a412-5bc0acd1705f&amp;recordId=43667&amp;layerId=10001&amp;x=0&amp;y=28&amp;scale=3.9363576909444004&amp;angle=0&amp;vw=1540&amp;vh=868</a>   |

|    |   |                                                |                                                                                                                                                                                                                                                                                                                                                                                                                                                                                                                   |
|----|---|------------------------------------------------|-------------------------------------------------------------------------------------------------------------------------------------------------------------------------------------------------------------------------------------------------------------------------------------------------------------------------------------------------------------------------------------------------------------------------------------------------------------------------------------------------------------------|
|    | C | Kidney (PAS)                                   | <a href="https://ictvslidewp01.usb.ch/OlyViaWeb/Html5Viewer?dbId=798403c7-6d3e-4d97-a412-5bc0acd1705f&amp;recordId=43672&amp;layerId=10001&amp;x=178&amp;y=0&amp;scale=3.1281921333445956&amp;angle=0&amp;vw=1540&amp;vh=868">https://ictvslidewp01.usb.ch/OlyViaWeb/Html5Viewer?dbId=798403c7-6d3e-4d97-a412-5bc0acd1705f&amp;recordId=43672&amp;layerId=10001&amp;x=178&amp;y=0&amp;scale=3.1281921333445956&amp;angle=0&amp;vw=1540&amp;vh=868</a>                                                             |
|    | D | Lung, upper and lower lobe (right)             | <a href="https://ictvslidewp01.usb.ch/OlyViaWeb/Html5Viewer?dbId=798403c7-6d3e-4d97-a412-5bc0acd1705f&amp;recordId=43677&amp;layerId=10001&amp;x=115&amp;y=0&amp;scale=4.078071519678464&amp;angle=0&amp;vw=1540&amp;vh=868">https://ictvslidewp01.usb.ch/OlyViaWeb/Html5Viewer?dbId=798403c7-6d3e-4d97-a412-5bc0acd1705f&amp;recordId=43677&amp;layerId=10001&amp;x=115&amp;y=0&amp;scale=4.078071519678464&amp;angle=0&amp;vw=1540&amp;vh=868</a>                                                               |
|    | E | Lung, upper lobe (right)                       | <a href="https://ictvslidewp01.usb.ch/OlyViaWeb/Html5Viewer?dbId=798403c7-6d3e-4d97-a412-5bc0acd1705f&amp;recordId=43682&amp;layerId=10001&amp;x=263&amp;y=0&amp;scale=2.487300894366276&amp;angle=0&amp;vw=1540&amp;vh=868">https://ictvslidewp01.usb.ch/OlyViaWeb/Html5Viewer?dbId=798403c7-6d3e-4d97-a412-5bc0acd1705f&amp;recordId=43682&amp;layerId=10001&amp;x=263&amp;y=0&amp;scale=2.487300894366276&amp;angle=0&amp;vw=1540&amp;vh=868</a>                                                               |
|    | F | Lung, lower lobe (right)                       | <a href="https://ictvslidewp01.usb.ch/OlyViaWeb/Html5Viewer?dbId=798403c7-6d3e-4d97-a412-5bc0acd1705f&amp;recordId=43687&amp;layerId=10001&amp;x=260&amp;y=0&amp;scale=2.171548076265306&amp;angle=0&amp;vw=1540&amp;vh=868">https://ictvslidewp01.usb.ch/OlyViaWeb/Html5Viewer?dbId=798403c7-6d3e-4d97-a412-5bc0acd1705f&amp;recordId=43687&amp;layerId=10001&amp;x=260&amp;y=0&amp;scale=2.171548076265306&amp;angle=0&amp;vw=1540&amp;vh=868</a>                                                               |
|    | G | Lung, upper and lower lobe (left)              | <a href="https://ictvslidewp01.usb.ch/OlyViaWeb/Html5Viewer?dbId=798403c7-6d3e-4d97-a412-5bc0acd1705f&amp;recordId=43692&amp;layerId=10001&amp;x=362&amp;y=0&amp;scale=1.940562585693451&amp;angle=0&amp;vw=1540&amp;vh=868">https://ictvslidewp01.usb.ch/OlyViaWeb/Html5Viewer?dbId=798403c7-6d3e-4d97-a412-5bc0acd1705f&amp;recordId=43692&amp;layerId=10001&amp;x=362&amp;y=0&amp;scale=1.940562585693451&amp;angle=0&amp;vw=1540&amp;vh=868</a>                                                               |
| 20 | A | Liver                                          | <a href="https://ictvslidewp01.usb.ch/OlyViaWeb/Html5Viewer?dbId=798403c7-6d3e-4d97-a412-5bc0acd1705f&amp;recordId=43697&amp;layerId=10001&amp;x=300.67525092698224&amp;y=38.331757187023555&amp;scale=3.51932670905211&amp;angle=0&amp;vw=1540&amp;vh=868">https://ictvslidewp01.usb.ch/OlyViaWeb/Html5Viewer?dbId=798403c7-6d3e-4d97-a412-5bc0acd1705f&amp;recordId=43697&amp;layerId=10001&amp;x=300.67525092698224&amp;y=38.331757187023555&amp;scale=3.51932670905211&amp;angle=0&amp;vw=1540&amp;vh=868</a> |
|    | B | Myocardium, anterior and posterior wall (left) | <a href="https://ictvslidewp01.usb.ch/OlyViaWeb/Html5Viewer?dbId=798403c7-6d3e-4d97-a412-5bc0acd1705f&amp;recordId=43702&amp;layerId=10001&amp;x=140&amp;y=0&amp;scale=3.8120791552654376&amp;angle=0&amp;vw=1540&amp;vh=868">https://ictvslidewp01.usb.ch/OlyViaWeb/Html5Viewer?dbId=798403c7-6d3e-4d97-a412-5bc0acd1705f&amp;recordId=43702&amp;layerId=10001&amp;x=140&amp;y=0&amp;scale=3.8120791552654376&amp;angle=0&amp;vw=1540&amp;vh=868</a>                                                             |
|    | C | Kidney (PAS)                                   | <a href="https://ictvslidewp01.usb.ch/OlyViaWeb/Html5Viewer?dbId=798403c7-6d3e-4d97-a412-5bc0acd1705f&amp;recordId=43782&amp;layerId=10001&amp;x=218&amp;y=0&amp;scale=2.328784925276153&amp;angle=0&amp;vw=1540&amp;vh=868">https://ictvslidewp01.usb.ch/OlyViaWeb/Html5Viewer?dbId=798403c7-6d3e-4d97-a412-5bc0acd1705f&amp;recordId=43782&amp;layerId=10001&amp;x=218&amp;y=0&amp;scale=2.328784925276153&amp;angle=0&amp;vw=1540&amp;vh=868</a>                                                               |
|    | D | Lung, upper and lower lobe (right)             | <a href="https://ictvslidewp01.usb.ch/OlyViaWeb/Html5Viewer?dbId=798403c7-6d3e-4d97-a412-5bc0acd1705f&amp;recordId=43712&amp;layerId=10001&amp;x=116&amp;y=0&amp;scale=3.4794209525002544&amp;angle=0&amp;vw=1540&amp;vh=868">https://ictvslidewp01.usb.ch/OlyViaWeb/Html5Viewer?dbId=798403c7-6d3e-4d97-a412-5bc0acd1705f&amp;recordId=43712&amp;layerId=10001&amp;x=116&amp;y=0&amp;scale=3.4794209525002544&amp;angle=0&amp;vw=1540&amp;vh=868</a>                                                             |
|    | E | Lung, lower lobe (right)                       | <a href="https://ictvslidewp01.usb.ch/OlyViaWeb/Html5Viewer?dbId=798403c7-6d3e-4d97-a412-5bc0acd1705f&amp;recordId=43717&amp;layerId=10001&amp;x=324&amp;y=0&amp;scale=1.8285413340794258&amp;angle=0&amp;vw=1540&amp;vh=868">https://ictvslidewp01.usb.ch/OlyViaWeb/Html5Viewer?dbId=798403c7-6d3e-4d97-a412-5bc0acd1705f&amp;recordId=43717&amp;layerId=10001&amp;x=324&amp;y=0&amp;scale=1.8285413340794258&amp;angle=0&amp;vw=1540&amp;vh=868</a>                                                             |
|    | F | Lung, upper and lower lobe (left)              | <a href="https://ictvslidewp01.usb.ch/OlyViaWeb/Html5Viewer?dbId=798403c7-6d3e-4d97-a412-5bc0acd1705f&amp;recordId=43722&amp;layerId=10001&amp;x=206&amp;y=0&amp;scale=3.6165489404641775&amp;angle=0&amp;vw=1540&amp;vh=868">https://ictvslidewp01.usb.ch/OlyViaWeb/Html5Viewer?dbId=798403c7-6d3e-4d97-a412-5bc0acd1705f&amp;recordId=43722&amp;layerId=10001&amp;x=206&amp;y=0&amp;scale=3.6165489404641775&amp;angle=0&amp;vw=1540&amp;vh=868</a>                                                             |
|    | G | Lung, lower lobe (left)                        | <a href="https://ictvslidewp01.usb.ch/OlyViaWeb/Html5Viewer?dbId=798403c7-6d3e-4d97-a412-5bc0acd1705f&amp;recordId=43727&amp;layerId=10001&amp;x=111&amp;y=0&amp;scale=4.306231408001706&amp;angle=0&amp;vw=1540&amp;vh=868">https://ictvslidewp01.usb.ch/OlyViaWeb/Html5Viewer?dbId=798403c7-6d3e-4d97-a412-5bc0acd1705f&amp;recordId=43727&amp;layerId=10001&amp;x=111&amp;y=0&amp;scale=4.306231408001706&amp;angle=0&amp;vw=1540&amp;vh=868</a>                                                               |
| 21 | A | Liver                                          | <a href="https://ictvslidewp01.usb.ch/OlyViaWeb/Html5Viewer?dbId=798403c7-6d3e-4d97-a412-5bc0acd1705f&amp;recordId=43732&amp;layerId=10001&amp;x=277&amp;y=0&amp;scale=3.7403401870102763&amp;angle=0&amp;vw=1540&amp;vh=868">https://ictvslidewp01.usb.ch/OlyViaWeb/Html5Viewer?dbId=798403c7-6d3e-4d97-a412-5bc0acd1705f&amp;recordId=43732&amp;layerId=10001&amp;x=277&amp;y=0&amp;scale=3.7403401870102763&amp;angle=0&amp;vw=1540&amp;vh=868</a>                                                             |

|   |                                        |                                                                                                                                                                                                                                                                                                                                                                                                                                                       |
|---|----------------------------------------|-------------------------------------------------------------------------------------------------------------------------------------------------------------------------------------------------------------------------------------------------------------------------------------------------------------------------------------------------------------------------------------------------------------------------------------------------------|
| B | Myocardium, posterior wall             | <a href="https://ictvslidewp01.usb.ch/OlyViaWeb/Html5Viewer?dbId=798403c7-6d3e-4d97-a412-5bc0acd1705f&amp;recordId=43737&amp;layerId=10001&amp;x=0&amp;y=46&amp;scale=5.79687982472908&amp;angle=0&amp;vw=1540&amp;vh=868">https://ictvslidewp01.usb.ch/OlyViaWeb/Html5Viewer?dbId=798403c7-6d3e-4d97-a412-5bc0acd1705f&amp;recordId=43737&amp;layerId=10001&amp;x=0&amp;y=46&amp;scale=5.79687982472908&amp;angle=0&amp;vw=1540&amp;vh=868</a>       |
| C | Myocardium, posterior wall (Congo red) | <a href="https://ictvslidewp01.usb.ch/OlyViaWeb/Html5Viewer?dbId=798403c7-6d3e-4d97-a412-5bc0acd1705f&amp;recordId=43742&amp;layerId=10001&amp;x=116&amp;y=0&amp;scale=4.411383421180628&amp;angle=0&amp;vw=1540&amp;vh=868">https://ictvslidewp01.usb.ch/OlyViaWeb/Html5Viewer?dbId=798403c7-6d3e-4d97-a412-5bc0acd1705f&amp;recordId=43742&amp;layerId=10001&amp;x=116&amp;y=0&amp;scale=4.411383421180628&amp;angle=0&amp;vw=1540&amp;vh=868</a>   |
| D | Kidney (PAS)                           | <a href="https://ictvslidewp01.usb.ch/OlyViaWeb/Html5Viewer?dbId=798403c7-6d3e-4d97-a412-5bc0acd1705f&amp;recordId=43747&amp;layerId=10001&amp;x=231&amp;y=0&amp;scale=2.1689197762832965&amp;angle=0&amp;vw=1540&amp;vh=868">https://ictvslidewp01.usb.ch/OlyViaWeb/Html5Viewer?dbId=798403c7-6d3e-4d97-a412-5bc0acd1705f&amp;recordId=43747&amp;layerId=10001&amp;x=231&amp;y=0&amp;scale=2.1689197762832965&amp;angle=0&amp;vw=1540&amp;vh=868</a> |
| E | Lung, upper and lower lobe (right)     | <a href="https://ictvslidewp01.usb.ch/OlyViaWeb/Html5Viewer?dbId=798403c7-6d3e-4d97-a412-5bc0acd1705f&amp;recordId=43752&amp;layerId=10001&amp;x=250&amp;y=0&amp;scale=3.887609783407397&amp;angle=0&amp;vw=1540&amp;vh=868">https://ictvslidewp01.usb.ch/OlyViaWeb/Html5Viewer?dbId=798403c7-6d3e-4d97-a412-5bc0acd1705f&amp;recordId=43752&amp;layerId=10001&amp;x=250&amp;y=0&amp;scale=3.887609783407397&amp;angle=0&amp;vw=1540&amp;vh=868</a>   |
| F | Lung, upper lobe (right)               | <a href="https://ictvslidewp01.usb.ch/OlyViaWeb/Html5Viewer?dbId=798403c7-6d3e-4d97-a412-5bc0acd1705f&amp;recordId=43757&amp;layerId=10001&amp;x=326&amp;y=0&amp;scale=2.069939450395901&amp;angle=0&amp;vw=1540&amp;vh=868">https://ictvslidewp01.usb.ch/OlyViaWeb/Html5Viewer?dbId=798403c7-6d3e-4d97-a412-5bc0acd1705f&amp;recordId=43757&amp;layerId=10001&amp;x=326&amp;y=0&amp;scale=2.069939450395901&amp;angle=0&amp;vw=1540&amp;vh=868</a>   |
| G | Lung, upper and lower lobe (left)      | <a href="https://ictvslidewp01.usb.ch/OlyViaWeb/Html5Viewer?dbId=798403c7-6d3e-4d97-a412-5bc0acd1705f&amp;recordId=43762&amp;layerId=10001&amp;x=269&amp;y=0&amp;scale=3.844262791401756&amp;angle=0&amp;vw=1540&amp;vh=868">https://ictvslidewp01.usb.ch/OlyViaWeb/Html5Viewer?dbId=798403c7-6d3e-4d97-a412-5bc0acd1705f&amp;recordId=43762&amp;layerId=10001&amp;x=269&amp;y=0&amp;scale=3.844262791401756&amp;angle=0&amp;vw=1540&amp;vh=868</a>   |
| H | Lung, lower lobe (left)                | <a href="https://ictvslidewp01.usb.ch/OlyViaWeb/Html5Viewer?dbId=798403c7-6d3e-4d97-a412-5bc0acd1705f&amp;recordId=43767&amp;layerId=10001&amp;x=291&amp;y=0&amp;scale=1.8867962978687271&amp;angle=0&amp;vw=1540&amp;vh=868">https://ictvslidewp01.usb.ch/OlyViaWeb/Html5Viewer?dbId=798403c7-6d3e-4d97-a412-5bc0acd1705f&amp;recordId=43767&amp;layerId=10001&amp;x=291&amp;y=0&amp;scale=1.8867962978687271&amp;angle=0&amp;vw=1540&amp;vh=868</a> |
